# **Isoform-specific roles of the *Drosophila* filamin-type protein Jitterbug (Jbug) during development**

SeYeon Chung<sup>1,\*</sup>, Thao Phuong Le<sup>1</sup>, Vishakha Vishwakarma<sup>1</sup>, Yim Ling Cheng<sup>2</sup> and Deborah J. Andrew<sup>2</sup>

<sup>1</sup> Department of Biological Sciences, Louisiana State University, Baton Rouge, LA 70803, USA

<sup>2</sup> Department of Cell Biology, Johns Hopkins University School of Medicine, Baltimore, MD 21205, USA

\*Author for correspondence: [seyeonchung@lsu.edu](mailto:seyeonchung@lsu.edu)

**Key words:** *Drosophila*, filamin, *jitterbug*, actin, thoracic bristles, epidermal denticles, tubular epithelial organs, trans-splicing

## ABSTRACT

Filamins are highly conserved actin-crosslinking proteins that regulate organization of the actin cytoskeleton. As key components of versatile signaling scaffolding complexes, filamins are implicated in developmental anomalies and cancer. Multiple isoforms of filamins exist, raising the possibility of distinct functions of each isoform during development and in diseases. Here, we provide an initial characterization of *jitterbug* (*jbug*), which encodes one of the two filamin-type genes in *Drosophila*. We generate Jbug antiserum that recognizes all of the spliced forms, which reveals differential expression of different Jbug isoforms during development with a significant maternal contribution of Jbug protein. To reveal the function of Jbug isoforms, we create new genetic tools, including a null allele that deletes all isoforms, hypomorphic alleles that affect only a subset, and UAS lines for expression of the major isoforms. Using these tools, we demonstrate that Jbug is required for viability and that specific isoforms of Jbug are required in the formation of actin-rich protrusions such as thoracic bristles in adults and ventral denticles in the embryo. We also provide evidence for trans-splicing in the *jbug* locus.



## Introduction

Actin-crosslinking proteins organize actin filaments into higher-order structures such as orthogonal actin arrays and parallel actin bundles. Filamins are highly conserved large cytoplasmic proteins that crosslink actin filaments into dynamic three-dimensional structures (Nakamura *et al.* 2011; Razinia *et al.* 2012). Filamins consist of actin-binding Calponin-homology (CH) domains at their N-terminus, followed by a long C-terminal rod-like domain of filamin-type immunoglobulin (IG-FLMN) repeats. Dimerization of filamins through the last C-terminal IG-FLMN repeat allows the formation of a flexible V-shaped structure that holds two actin filaments at large angles to create either a loose three-dimensional actin network (Nakamura *et al.* 2011; Razinia *et al.* 2012) or parallel bundles of actin filaments (Sokol and Cooley 1999; Gay *et al.* 2011). In addition to binding to actin, filamins interact with transmembrane receptors, adhesion molecules and even transcription factors, and are thus involved in multiple cell functions including motility, maintenance of cell shape, and differentiation (Nakamura *et al.* 2011; Razinia *et al.* 2012). Mutations in filamins are associated with a wide range of congenital anomalies and have been shown to both promote and inhibit metastasis and cancer growth (Razinia *et al.* 2012; Savoy and Ghosh 2013; Shao *et al.* 2016; Sasaki *et al.* 2019), emphasizing the multiple critical roles of filamins in development and disease.

Studies in *Drosophila* have helped refine our understanding of the roles of filamins in vivo. *Drosophila* has two orthologs of human filamin A: Cheerio (Cher) and Jitterbug (Jbug). Cher shares the organization of the protein and 46% identity and 61% similarity in amino acid sequence with human filamin A. Jbug, with 23% identity and 36% similarity in amino acid sequence with human filamin A, has some distinct features, including an actin-binding domain consisting of three, instead of two, CH domains. Several studies have revealed roles for Cher in organizing the F-actin cytoskeleton in multiple developmental contexts and diseases, including formation of ovarian germline ring canals (Li *et al.* 1999; Sokol and Cooley 1999; Huelsmann *et al.* 2016), follicle cell migration (Sokol and Cooley 2003), tissue morphogenesis during cellularization (Krueger *et al.* 2019), and *Drosophila* tumorigenesis (Külshammer and Uhlirova 2013). Compared to the extensive studies on Cher, our understanding of the roles of Jbug is more limited. Originally identified as a gene that causes bang-sensitive seizure – the phenotype that gives the gene its *jitterbug* name (Song and Tanouye 2006), *jbug* has been shown to be required in photoreceptor cells for axon targeting (Oliva *et al.* 2015) and in tendon cells to maintain their shape at the muscle-tendon junction (Olguín *et al.* 2011; Manieu *et al.* 2018).

Multiple isoforms of filamin proteins exist in both *Drosophila* and mammals (Sokol and Cooley 1999; Browne *et al.* 2000; Van der Flier and Sonnenberg 2001; Gorlin *et al.* 1990; Wang *et al.* 2007). Originally, only two Cher isoforms had been reported: a large isoform (FLN240) that contains both actin-binding CH domains and IG-FLMN repeats and a smaller one (FLN90) that contains only IG-FLMN repeats (Sokol and Cooley 1999). Recent annotations indicate that *cher* encodes six longer isoforms (>240 kDa), which include two actin-binding CH domains and 18-22 IG-FLMN repeats, and four shorter isoforms (90-100 kDa), which include only eight IG-FLMN repeats without any CH domains (Flybase; [www.flybase.org](http://www.flybase.org); Thurmond *et al.* 2019). Importantly, a recent study in *Drosophila* larval neuromuscular junctions revealed a role for the shorter Cher isoform (FLN90) in synapse formation (Lee and Schwarz 2016), suggesting distinct roles for different isoforms. Like *cher*, *jbug* also encodes multiple isoforms with a range of protein sizes. The roles for *jbug*, however, have been revealed mostly using RNA interference (RNAi) constructs that target most of the existing splice forms, preventing the characterization of isoform-specific roles for Jbug.

Here, we report on the creation of several new genetic tools for parsing out the roles of the different Jbug isoforms, including a null allele that deletes all isoforms and hypomorphic alleles that affect only a few. We also create UAS constructs for expressing some of the major Jbug isoforms. We demonstrate that different isoforms are differentially expressed during development and localize to different domains in embryonic epithelia. We further show an essential role for Jbug in organismal viability and epithelial morphogenesis. We also show isoform-specific roles of Jbug in formation of epidermal denticles during embryogenesis and thoracic bristles in adults. We also report on the rescue of *jbug* function through trans-splicing.

## Materials and Methods

### Fly stocks and husbandry

Fly lines used in our experiments were: *jbug*<sup>20</sup>, *jbug*<sup>30</sup>, *jbug*<sup>133</sup>, UAS-Jbug-RC, UAS-Jbug-RF (this work); UAS-Jbug-RL (Olguín *et al.* 2011); *Oregon R*, *fkh-Gal4* (Henderson and Andrew 2000), *69B-Gal4* (Rorth 1996); *da-Gal4* (Wodarz *et al.* 1995); *matα-Gal4* (Häcker and Perrimon 1998), *Df(2R)59AB*, *Df(2R)Exel6079*, *TRiP.JF01116* (Bloomington Stock Center); *GD8664*, *GD13033* (Vienna *Drosophila* RNAi Center). All crosses were performed at 25°C.

### Generation of *jbug* mutant alleles

*jbug* mutants were generated by homologous recombination (Gong and Golic 2003). For *jbug*<sup>20</sup> null mutants, genomic fragments upstream and downstream of the *jbug* ORF were amplified by PCR using the following primers (restriction sites in bold and linkers in italic):

in-fusion\_L-22737893, 5'-CTAGTCTAGGGCGCGCCGATGAGTTGTGGCTTGAGCA-3'

in-fusion\_R-22742442, 5'-TAGGGGATCACGTACGGCCAAACCAATGCTGAAGAT-3'

NotI\_L-22717574, 5'-AT**GCGGCCGCT**AGAGGGGAGAGCAAGTGGA-3'

Acc65I\_R-22721186, 5'-ATAG**GTACCGTGT**GAGCTTCGGGATCAAT-3'

For *jbug*<sup>30</sup> and *jbug*<sup>133</sup> hypomorphic alleles, genomic fragments upstream and downstream of an exon common to all *jbug* splice forms were amplified using the following primers (restriction sites in bold):

AscI\_L-22727168, 5'-AT**GGCGCGCCAAAGCCGTTGAAGAAAGCAA**-3'

BsiWI\_R-22731840, 5'-AT**ACGTACGCTCGATGC**ACTTTGTCTCCA-3'

NotI\_L-22717574, 5'-AT**GCGGCCGCT**AGAGGGGAGAGCAAGTGGA-3'

Acc65I\_R-22721186, 5'-ATAG**GTACCGTGT**GAGCTTCGGGATCAAT-3'

PCR fragments were cloned into pW25, which carries *white*<sup>+</sup>, the recognition site for I-SceI endonuclease, and FRT sites. The constructs were injected into *w*<sup>1118</sup> embryos by Rainbow Transgenic Flies, Inc. Transformants were crossed to flies carrying hs-I-SceI and hs-Flp and progeny were heat shocked (37°C) for 1 hour 48–72 hours after egg laying (AEL). Recombination and insertion were confirmed by genomic PCR and reverse-transcriptase PCR (RT-PCR) followed by sequencing.

The following primers were used for RT-PCR for *jbug*<sup>20</sup> shown in Supplemental Figure 1 (restriction sites in bold and linkers in italic):

*jbug* 5-1, 5'-GGAGAACAAGTACCGGGTGA-3'

*jbug* 5-2, 5'-GGATCCTCGAGCATATGTCCTTCCACGTTACCTCGA-3' (same as Jbug-Ab-3' for making Jbug antibody)

*jbug* 3-1, 5'-AT**GCGGCCGCT**AGAGGGGAGAGCAAGTGA-3' (same as NotI\_L-22717574 used for amplifying a homology arm downstream of the *jbug* ORF)

*jbug* 3-2, 5'-CGCGCGGCAGCCATATGATGTCCTCACCCGGCCTAAC-3' (same as Jbug-Ab-5' for making Jbug antibody)

### Generation of UAS-Jbug-RC and -RF transgenic flies

An ORF for *jbug-RC* (1230 bp) was PCR-amplified using the existing cDNA RE40504 as a template. A full cDNA for *jbug-RF* (9430 bp) was created by In-Fusion cloning of three fragments. The 5' fragment was prepared by enzyme digestion of RE40504 (cut with Apal and BamHI). The middle fragment (1189 bp) was amplified by reverse transcriptase-PCR (RT-PCR) and the Apal and BglII sites were added to the 5' and the 3' end of the fragment, respectively. The 3' fragment was amplified by PCR using GH03118 from the BglII site to the end of the ORF and the BamHI site was added to the 3' end. The ligated full cDNA was confirmed by sequencing. *jbug-RC* and *jbug-RF* ORFs were PCR-amplified and cloned into the pUAST vector (Brand and Perrimon, 1993) to create UAS-Jbug-RC and UAS-Jbug-RF. The DNA constructs were injected into *w*<sup>1118</sup> embryos by Rainbow Transgenics, Inc. (UAS-Jbug-RC) and by GenetiVision (UAS-Jbug-RF).

### Generation of Jbug antibody

A PCR fragment of 1212 bp that is common to all *jbug* splice forms was cloned into the pET15b vector. The fragment corresponds to almost the entire open reading frame for the Jbug-PC isoform except for the last six amino acids and contains four IG-FLMN repeats. Primers used for In-Fusion cloning were (restriction sites in bold and linkers in italic):

Jbug-Ab-5', 5'-CGCGCGGCAGCCATATGATGTCCTCACCCGGCCTAAC-3'

Jbug-Ab-3', 5'-GGATCCTCGAGCATATGTCCTTCCACGTTACCTCGA-3'

The construct was transformed into BL21-DE3 cells for protein induction with IPTG. Recombinant protein was purified using Ni-NTA agarose (Qiagen). Rabbit polyclonal antibodies

were generated by Covance, Inc. and used at a dilution of 1:500 for immunohistochemistry and 1:5,000 for western blot.

## Western blot

Protein extracts from embryos 0-2 and 2-16 hours AEL, 1<sup>st</sup>, 2<sup>nd</sup>, 3<sup>rd</sup> instar larvae, pupae (2 days after puparium formation (APF), and 2-day old male and female adults were used. For embryos homozygous for *jbug*<sup>20</sup>, *Df(2R)59AB* and *Df(2R)Exel6079* and for 1<sup>st</sup> instar larvae homozygous for *jbug*<sup>20</sup> and transheterozygous for *jbug*<sup>30</sup>/*Df(2R)Exel6079*, a balancer chromosome that contains the *twi*-Gal4 UAS-GFP construct was used to distinguish desired genotypes from heterozygous siblings. Rabbit  $\alpha$ -Jbug (this work; 1:5,000), mouse  $\alpha$ -Actin (RRID:AB\_11004139; Invitrogen; 1:2,000), and HRP-labelled secondary antibodies (RRID:AB\_430833; RRID:AB\_430834; Promega; 1:2,000) were used. Protein bands were detected using Pierce ECL Western Blotting Substrate.

## Scanning electron microscopy

Wild type (*Oregon R*) and *jbug*<sup>30</sup> homozygous male flies were coated with gold palladium and examined and photographed in a LEO/Zeiss Field-emission SEM.

## Antibody staining and confocal microscopy

Embryos were collected on grape juice-agar plates and processed for immunofluorescence using standard procedures. Briefly, embryos were dechorionated in 50% bleach, fixed in 1:1 heptane:formaldehyde for 40 min and devitellinized with 80% EtOH, then stained with primary and secondary antibodies in PBSTB (1X PBS, 0.1% Triton X-100, 0.2% BSA). For Jbug and phalloidin staining, embryos were hand-devitellinized. Antibodies used include: mouse  $\alpha$ -Crb (RRID: AB\_528181; DSHB 1:10), rabbit  $\alpha$ -CrebA (RRID: AB\_10805295; 1:5,000), guinea pig  $\alpha$ -Sage (Fox *et al.* 2013), chicken  $\alpha$ -GFP (RRID:AB\_2534023; Invitrogen; 1:500), rat  $\alpha$ -E-Cad (RRID: AB\_528120; DSHB; 1:50), rabbit  $\alpha$ -Jbug (this work; 1:500), rabbit  $\alpha$ - $\beta$ -Gal (RRID: AB\_221539; Invitrogen; 1:500). Alexa fluor 488, 568, 647-labelled secondary antibodies were used at 1:500 (RRID: AB\_142924; RRID: AB\_141778; RRID: AB\_2535766; RRID: AB\_143157; RRID: AB\_2535812; Molecular Probes). Alexa fluor-568-labeled phalloidin was used for F-actin labelling (RRID: AB\_2632953; Molecular Probes; 1:250). All images were taken with a Leica SP8 confocal microscope using either a 63x, 1.4 NA or a 40x, 1.3 NA oil objective and the LAS X software (Leica).

## **Quantification of denticle precursors in the ventral epidermis**

Embryos stained for phalloidin and E-Cad were imaged with a Leica SP8 confocal microscope. A maximum intensity projection was generated using two focal planes (0.3  $\mu\text{m}$  apart) in the region of adherens junctions. Denticle belts in abdominal segments 4-6 in stage 16 embryos were selected for quantification. Six columns of cells from anterior to posterior of each belt were analyzed. In each column, denticle precursors of four cells closest to the ventral midline were counted. For each genotype, five to eight embryos were quantified. Unpaired Student's t-test with Welch's correction was used for statistical analysis.

# Results

## Different splice forms of *jbug* are differentially expressed during development

Ten annotated splice forms of *jbug*, which encode six different protein isoforms, are reported in Flybase ([www.flybase.org](http://www.flybase.org); Thurmond *et al.* 2019). All isoforms contain multiple repeats of filamin-type immunoglobulin (IG-FMLN) domains (Figure 1, A and B), which form a rod-like structure in filamin. Two Jbug isoforms consist exclusively of these repeats; Jbug-PC/G/H/J/K (each splice form encodes the same 42.4 kDa protein; hereafter referred to as Jbug-PC) has four IG-FMLN repeats and Jbug-PI (185.7 kDa) has sixteen (Figure 1B). On the other hand, Jbug-PL (175.6 kDa) and Jbug-PF/M/N, the three longest Jbug isoforms (>300 kDa), contain three tandem calponin-homology (CH) actin-binding domains in their N-termini as well as multiple IG-FMNLs in their C-termini (seven and nineteen IG-FMLNs for Jbug-PL and Jbug-PF/M/N, respectively) (Figure 1B).

High-throughput expression data available in Flybase ([www.flybase.org](http://www.flybase.org); Thurmond *et al.* 2019) showed high expression of *jbug* splice forms throughout all developmental stages, except during 0-18 hour embryogenesis when there is very little expression of *jbug-RF*, *RM*, *RN* and *jbug-RL* (Figure 1C; FB2020\_04). To analyze protein expression levels of Jbug during *Drosophila* development, we generated Jbug antiserum that recognizes a protein domain encoded by all ten *jbug* splice forms (Figure 1A). This domain includes the four IG-FLMN repeats that are present in all Jbug isoforms (Figure 1B). Our Western blot analysis using wild-type protein extracts revealed that Jbug proteins are detected at high levels throughout all developmental stages (Figure 1D). Strong Jbug signals in protein extracts from 0-2 hour embryos (Figure 1D) also suggest a maternally provided pool of Jbug.

The Jbug antiserum detected bands in the size ranges that are predicted from the major splice forms (42.4 kDa, 175.6 kDa, 185.7 kDa, >300 kDa). Importantly, the different isoforms were differentially expressed during development (Figure 1D). Jbug-PC (42.4 kDa) was abundant only in pupae and Jbug-PL (175.6 kDa) was most abundant in adults (Figure 1D). Bands corresponding in size to Jbug-PI (185.7 kDa) and Jbug-PF/M/N (>300 kDa) were detected at all stages with slight differences in protein levels (Figure 1D). Jbug-PF/M/N isoforms differ only slightly from one another in regions outside the CH and IG-FLMN domains. Due to their huge sizes and a very slight difference in molecular weight among Jbug-PF/M/N, we were not able to distinguish exactly which of the three isoforms is expressed at any specific stage. The large size of these isoforms also diminishes membrane transfer, leading to relatively weak signals. Notably, several intermediate-sized bands that did not match the predicted size of annotated isoforms



were also detected at different levels throughout development (Figure 1D). The existence of these bands suggests either that more Jbug isoforms exist than have been annotated or that proteolyzed and/or phosphorylated fragments are being detected (also see Figure 2F; most of these extra bands are absent in *jbug* null mutant larval extracts). Indeed, roles for proteolytic forms of Filamin A (Bedolla *et al.* 2009; Savoy and Ghosh 2013; Yue *et al.* 2013) as well as phosphorylated Filamin A (Ohta and Hartwig 1996; Tirupula *et al.* 2015) have been reported from studies of the mammalian proteins. Taken together, our data indicate that different splice forms of *jbug* are differentially expressed during *Drosophila* development.

### **Null and hypomorphic *jbug* alleles have been generated**

To investigate roles for *jbug* in development, we generated mutant alleles for *jbug* using homologous recombination (Gong and Golic 2003). Two donor DNA constructs were used to target different genomic regions. One construct targets the genomic region encompassing the translation start sites for all splice forms and extends through the exons shared by all splice forms; the other targets only the region containing the exons shared by all splice forms (Figure 2, A and B). With the construct that targets the larger region, we obtained a null mutant, *jbug*<sup>20</sup> (Figure 2A). PCR analysis confirmed that the entire targeted region was replaced with the mini-*white*<sup>+</sup> (mini-*w*<sup>+</sup>) gene (data not shown). Reverse transcriptase-PCR (RT-PCR) using mRNA extracted from homozygous *jbug*<sup>20</sup> embryos further confirmed that no *jbug* transcripts are produced in *jbug*<sup>20</sup> embryos (Supplemental Figure 1, A-C). Both *jbug*<sup>20</sup> homozygous animals and transheterozygotes for *jbug*<sup>20</sup> over either of the two deficiency lines that delete all or part of the *jbug* locus (*59AB* and *Exel6079*; Figure 2A) died during the first instar larval stage (Table 1). Western blot analysis using Jbug antiserum showed that whereas a significant amount of the Jbug proteins were detected in *jbug*<sup>20</sup> embryos (Figure 2E), almost all protein bands were absent by the first instar larval stage, with the exception of two low molecular weight bands that are likely to be from nonspecific cross-reactivity (Figure 2F). Similarly, all Jbug isoforms were detected both in *59AB* and *Exel6079* homozygous embryos (Figure 2I). These data suggest that Jbug proteins from maternally provided *jbug* mRNA or protein persist through embryogenesis. Since only very low level of *jbug* mRNA is detected in 0-2 hour wild-type embryos, based on RNA-Seq (Flybase; [www.flybase.org](http://www.flybase.org)) and in situ hybridization (Fly-FISH; <http://fly-fish.cabr.utoronto.ca>), it is more likely that the Jbug protein, and not the mRNA, is maternally provided.



With the DNA construct that aimed to replace the genomic region common for all splice forms of *jbug*, we unexpectedly obtained two hypomorphic alleles, *jbug*<sup>30</sup> and *jbug*<sup>133</sup>, that affect only a subset of splice forms (Figure 2, B-D). Incomplete recombination occurred in these two alleles, resulting in either a part (for *jbug*<sup>30</sup>) or the entire DNA construct (for *jbug*<sup>133</sup>) being inserted into the *jbug* locus (Figure 2B). In *jbug*<sup>30</sup>, one homology arm in the donor DNA recombined correctly, but the other homology arm was inserted into the genome along with the mini-w+ gene, rather than being recombined (Figure 2C). In *jbug*<sup>133</sup>, homologous recombination failed to occur; instead, the entire donor construct was inserted into the 3' UTR of the splice forms that have longer C-termini (*jbug*-RI and *jbug*-RF/M/N) (Figure 2D). These recombination events disrupt *jbug*-RI and *jbug*-RF/M/N in both alleles. Western blot analysis revealed that the Jbug-PF/M/N isoforms (>300 kDa) were either absent or decreased to undetectable levels in *jbug*<sup>30</sup> mutants at all stages (Figure 2, E-H and J). Jbug-PI (185.7 kDa) was also absent in *jbug*<sup>30</sup>, and instead, a smaller protein (~90 kDa) was detected in *jbug*<sup>30</sup> mutant animals at all stages (Figure 2, E-H and J). This additional band was not detected in wild type or *jbug*<sup>133</sup> protein extracts at any stages, suggesting that insertion of the DNA construct generates a truncated form of Jbug-PI in *jbug*<sup>30</sup>. In *jbug*<sup>133</sup>, both Jbug-PF/M/N and Jbug-PI protein bands were slightly decreased in intensity (Figure 2, E-H), suggesting that insertion of the construct in the 3' UTR region either affects mRNA stability or inhibits translation of these isoforms. Consistent with the molecular data, we did not detect any significant changes in the level of Jbug-PC (42.4 kDa) and Jbug-PL (175.6 kDa) in *jbug*<sup>30</sup> and *jbug*<sup>133</sup> protein extracts (Figure 2, E-H). Taken together, we generated new alleles for *jbug*, including a null mutant and two hypomorphic alleles that disrupt a subset of Jbug isoforms, specifically Jbug-PI and Jbug-PF/M/N.

### ***jbug* hypomorphs show semi-lethality and defects in bristle development on the thorax**

Many homozygous flies in *jbug*<sup>30</sup> and *jbug*<sup>133</sup> died during pupation, leaving a number of dead pupae that never eclosed. In both alleles, homozygous adult flies that survived were fertile and homozygous lines could be maintained. Interestingly, adult flies homozygous for *jbug*<sup>30</sup> or *jbug*<sup>133</sup> produced short, bent and rough-ended bristles on the thorax (Figure 3A), suggesting a role for Jbug in bristle development, perhaps in crosslinking actin bundles that form the bristles. Consistent with our findings that levels of Jbug-PF/M/N and Jbug-PI were more significantly reduced in *jbug*<sup>30</sup> than in *jbug*<sup>133</sup> (Figure 2, E-H), *jbug*<sup>30</sup> flies showed a higher expressivity of bristle defects than *jbug*<sup>133</sup>. Whereas almost every thoracic bristle had defects in *jbug*<sup>30</sup> homozygous adults, only a few bristles showed distinguishable defects in *jbug*<sup>133</sup> homozygotes (Figure 3A).

To analyze the bristle defects in more detail, we performed scanning electron microscopy (SEM) in wild type and *jbug*<sup>30</sup> homozygous mutant adults. Whereas wild-type animals showed nicely elongated and tapered bristles that suggested evenly aligned actin bundles (Figure 3B, a and a'), *jbug*<sup>30</sup> mutant flies had bristles that were short, curved (Figure 3B, c), bent (Figure 3B, d) and rough-ended (Figure 3B, e). Even when the bristles looked relatively normal, they were often shorter than wild type and mildly twisted (Figure 3B; compare b and b' to f and f').

Transheterozygotes of *jbug*<sup>30</sup> or *jbug*<sup>133</sup> over the *jbug*<sup>20</sup> null allele or the *59AB* deficiency line that deletes the entire *jbug* gene (Figure 2, C and D) showed both semi-lethality and the same bristle defects as observed in homozygous *jbug*<sup>30</sup> and *jbug*<sup>133</sup> adults (Table 1). These data suggest that both phenotypes are due to loss of *jbug* function. Consistent with our data that *jbug*<sup>30</sup> is a more severe hypomorphic allele than *jbug*<sup>133</sup> (Figure 2, E-H; Figure 3A), fewer transheterozygous *jbug*<sup>30</sup>/*jbug*<sup>20</sup> or *jbug*<sup>30</sup>/*59AB* flies survived to the adult stage compared to transheterozygous *jbug*<sup>133</sup>/*jbug*<sup>20</sup> or *jbug*<sup>133</sup>/*59AB* flies (Table 1). Taken together, these data suggest that Jbug-PF/M/N and/or PI are important for viability and for actin bundle arrangement within bristles.

We also performed complementation tests using the deficiency line *Exel6079*, which deletes through the genomic region encoding the N-terminal exons of transcripts of *jbug*-RL and *jbug*-RF/M/N, but leaves the coding region for *jbug*-RC and *jbug*-RI intact (Figure 2, C and D). Interestingly, transheterozygous *jbug*<sup>30</sup>/*Exel6079* (and *jbug*<sup>133</sup>/*Exel6079*) flies showed neither semi-lethality nor bristle defects (Table 1). This finding was unexpected because Jbug-PF/M/N should be absent in transheterozygous *jbug*<sup>30</sup>/*Exel6079* flies; *jbug*<sup>30</sup> and *Exel6079* disrupt the 3' and the 5' ends of *jbug*-RF/M/N, respectively. To test which isoforms are present in *jbug*<sup>30</sup>/*Exel6079* flies, we performed Western blot using extracts from *jbug*<sup>30</sup>/*Exel6079* transheterozygous 1<sup>st</sup> instar larvae. Surprisingly, strong Jbug-PF/M/N bands were detected in *jbug*<sup>30</sup>/*Exel6079* (Figure 2J). The rescue of *jbug*<sup>30</sup> and *Jbug*<sup>133</sup> phenotypes by *Exel6079* and the presence of protein isoforms that should be missing in either *Exel6079* or in the *jbug* hypomorphic alleles, suggest some form of trans-splicing, wherein the 5' exons encoded on the *jbug* hypomorphic chromosomes are spliced to 3' exons encoded on the *Exel6079* chromosome.

## **Expression of Jbug-RF rescues the bristle defects and semi-lethality of *jbug* hypomorphs**

To begin to parse out the functions of the different Jbug isoforms, we created two new UAS-lines, one encoding Jbug-PC (42 kDa protein) and one encoding Jbug-PF (>300 kDa protein). We also obtained a UAS construct for Jbug-PL (175.6 kDa protein) expression from the Mlodzik lab (Olguín *et al.* 2011). We first tested whether expression of any specific *jbug* splice form(s)

could rescue the lethality of *jbug*<sup>20</sup> null mutants. Each of the three constructs was expressed in *jbug*<sup>20</sup> mutant background using *daughterless-Gal4* (*da-Gal4*; Wodarz et al., 1995), which is expressed in all cells, or *69B-Gal4* (Rorth 1996), which is expressed in ectodermal cells. None of the UAS-constructs rescued the lethality of *jbug*<sup>20</sup>; indeed, no larvae survived past the 1st instar larval stage. These data suggest that multiple Jbug isoforms are required for viability.

We next tested whether expression of specific Jbug isoforms could rescue the bristle defects in *jbug*<sup>30</sup>, the severe hypomorphic allele. Consistent with the data that Jbug-PC is not affected in *jbug*<sup>30</sup> mutants, overexpression of *jbug-RC* with *da-Gal4* or with *69B-Gal4* in an otherwise wild-type background did not result in any overt defects in bristles (Figure 3C) nor did it rescue the bristle defects of *jbug*<sup>30</sup> homozygotes (Figure 3E). On the other hand, overexpression of *jbug-RF* in otherwise wild-type animals resulted in shorter and thicker bristles (Figure 3D), suggesting that proper levels of Jbug-PF/M/N are critical for normal bristle development. Importantly, expression of *jbug-RF* in *jbug*<sup>30</sup> mutants using *da-Gal4* or *69B-Gal4* nearly completely rescued the bristle phenotypes (Figure 3F). Moreover, *jbug-RF* expression in *jbug*<sup>30</sup> mutants also rescued semi-lethality. 86% (27/32) of pupae emerged as adult flies when *jbug-RF* was overexpressed in *jbug*<sup>30</sup> mutants whereas only 26% (9/35) of *jbug*<sup>30</sup> homozygous pupae emerged as adult flies. These data suggest that the bristle defects and semi-lethality observed in *jbug*<sup>30</sup> are due to loss of the longest (>300 kDa) Jbug isoforms.

### **Jbug hypomorphs show delay in actin-based prehair formation and mild defects in wing hair orientation**

Besides thoracic bristle defects, *jbug*<sup>30</sup> and *jbug*<sup>133</sup> homozygous adults also showed a mild swirling pattern of wing hairs (Supplemental Figure 2, B and C). Phalloidin staining of actin-rich prehairsts at 32 hours after puparium formation (APF) revealed that hair formation is delayed in *jbug*<sup>30</sup> pupal wings (Supplemental Figure 2, D and E). A swirling pattern of wing hairs and delayed prehair formation are often observed in mutants for planar cell polarity (PCP) genes (Adler 2012). *jbug*<sup>30</sup> mutant eyes, however, did not have any defects in ommatidial rotation characteristic of loss of key PCP genes (Supplemental Figure 2, F and G), suggesting that Jbug is not involved in ommatidial rotation. Overall, these data suggest that proper levels for Jbug-PF/M/N and/or Jbug-PI are required for the timely maturation of the actin bundles that form the prehairsts.

### **Jbug proteins localize in a dynamic pattern in the embryonic epithelium**

We next analyzed the subcellular localization of Jbug proteins during embryogenesis in wild type and *jbug* mutant alleles. During early development, Jbug was detected as small punctate structures in the cytoplasm of all cells (Figure 4A). During stages 11-13, Jbug was detected at a high level both near the apical surface and at and near the adherens junctions (AJs) in all epidermal cells (Figure 4B). AJ Jbug signals became weaker over time, and by stage 15, only mesh-like signals on the apical surface remained (Figure 4C). In *jbug*<sup>20</sup> mutant embryos, AJ signals were absent but strong signals on the apical surface were still detected (Figure 4D). At stage 15 and later, apical surface signals were slightly decreased compared to wild type levels (Figure 4E). Since the *jbug*<sup>30</sup> and *jbug*<sup>133</sup> homozygotes that survived to adult stages were fertile, we analyzed Jbug signals in *jbug*<sup>30</sup> or *jbug*<sup>133</sup> embryos from homozygous mothers. Interestingly, in *jbug*<sup>30</sup> embryos from *jbug*<sup>30</sup> homozygous mothers, Jbug signals were both very weak and dispersed in epidermal cells throughout the stages, and largely absent in AJs (Figure 4, F and G), suggesting that Jbug-PF/M/N and Jbug-PI might be major isoforms that show strong embryonic expression and AJ localization. Expression of Jbug-RF in the *jbug*<sup>30</sup> mutant background restored strong signals at AJs (Figure 4G) and on the apical surface (Figure 4K) at stage 13 and 15, respectively. Consistent with the minor changes in Jbug protein levels in *jbug*<sup>133</sup>, Jbug staining was mostly normal, albeit slightly reduced, in the epidermal cells in *jbug*<sup>133</sup> embryos from homozygous *jbug*<sup>133</sup> mothers (Figure 4, H and I).

BDGP Expression Data showed that, in addition to the strong ectodermal expression at earlier stages, *jbug* is also upregulated in epithelial tubular organs, including the trachea and the salivary gland (<https://insitu.fruitfly.org/cgi-bin/ex/insitu.pl>). Our previous work also showed that tracheal expression of *jbug* is upregulated by Trachealess, a major transcription factor in the trachea (Chung *et al.* 2011). Consistent with mRNA expression, antibody staining in wild-type embryos revealed accumulation of Jbug protein in the trachea and the salivary gland (Figure 5, A and E). Interestingly, Jbug was abundant in both the cytoplasm and in a distinct apical domain of both tracheal and salivary gland cells, which appeared to be just under the apical surface (Figure 5, A and E), as opposed to following the AJ pattern of E-Cad. This apical staining was prominent up to stage 14 in the salivary gland; at later stages, Jbug signals were observed mostly in the cytoplasm and detected in the apical domain only as a thin layer along the lumen (compare Figure 5E to Figure 6A).

Jbug signals in tubular epithelial organs were significantly decreased in *jbug*<sup>20</sup> embryos, even with regards to surrounding tissues (Figure 5, B and F), suggesting that zygotic *jbug* expression is required for upregulation of Jbug in these tissues. In *jbug*<sup>20</sup>, the apical staining in the trachea

was absent and in the salivary gland was more punctate. In *jbug*<sup>30</sup>, apical staining of Jbug in the trachea and salivary glands was also absent; instead, uniform Jbug signals were detected in the cytoplasm (Figure 5, C and G). Consistent with slight changes in Jbug protein levels in *jbug*<sup>133</sup>, Jbug signals were mostly normal, albeit slightly reduced, in the trachea and salivary glands in *jbug*<sup>133</sup> (Figure 5, D and H; data not shown). These data suggest that Jbug-PF/M/N (>300 kDa) and/or Jbug-PI (185 kDa) are enriched in the apical domain in tubular epithelial organs in the embryo.

### **Jbug function in embryonic epithelial tubes**

Despite the absence or mislocalization of Jbug in the apical domain of trachea and salivary glands, both organs developed normally without showing overt morphological defects in *jbug*<sup>20</sup> and *jbug*<sup>30</sup> embryos (Figure 5, B, C, F and G). To ask if maternally supplied *jbug* is sufficient for embryonic development, we maternally knocked down *jbug* using the *matα-Gal4* driver (Häcker and Perrimon 1998) to express a *jbug* RNAi construct that targets all *jbug* splice forms. Maternal knockdown of *jbug* did not result in overt defects in overall embryo morphology (data not shown). However, knockdown of *jbug* both maternally and zygotically using *matα-Gal4* and *fork head-Gal4* drivers (*fkh-Gal4*; a driver that drives expression in several embryonic tissues including the salivary gland; Henderson and Andrew 2000) resulted in severe morphological defects in the embryo, including deeper segmental grooves and a wider salivary gland lumen (Figure 5J). These data suggest that both maternal or zygotic pools of *jbug* are required for tubular epithelial organ morphogenesis.

To test the effect of Jbug overexpression in tubular epithelial tissues, we overexpressed different Jbug isoforms (Jbug-PC, PL and PF) in the salivary gland using *fkh-Gal4*. Interestingly, overexpression of each isoform caused an expanded and irregular apical domain (Figure 6, B-F). Moreover, the apical protein Crb, which is normally enriched in a sub-apical domain just apical to the AJs in many epithelial cells including salivary gland cells (Fig 6A, inset in Crb column; Wodarz *et al.* 1995; Tepass 1996; Chung and Andrew 2014), was mislocalized and dispersed along the entire apical surface in Jbug-overexpressing salivary glands (Figure 6, B-F). These data indicate that overexpression of multiple Jbug isoforms can disrupt the sub-apical domain enrichment of Crb. Interestingly, unlike other isoforms that are primarily localized in the cytoplasm when overexpressed (Figure 6, D-F), both untagged and C-terminal GFP-tagged Jbug-PC were detected in the cytoplasm and in nuclei (Figure 6, B and C). These data suggest that this smallest isoform – which is primarily expressed in pupae (Figure 1D) – might function in



the nucleus as well. Taken together, these data suggest that appropriate levels of Jbug isoforms are important for apical organization of tubular epithelial cells during organ development.

### **Jbug is required for denticle formation in the epidermis**

Jbug antibody staining in the ventral regions of stage 14 embryos revealed intense signals on the apical surface that presaged the actin-rich denticles that begin to form during stage 15 (Figure 7, B and C). This prompted us to ask if denticle formation was normal in *jbug* mutants. In wild type embryos, six rows of epidermal cells in the anterior portion of each segment normally produce one or more denticles, forming a trapezoidal belt (Bejsovec 2013; Figure 7, C and D; Figure 8A). Embryos homozygous for *jbug*<sup>20</sup> did not show any overt morphological defects, likely due to strong maternal contribution (see Figure 1D and 2E), but they exhibited defects in denticle formation. Similarly, *jbug*<sup>30</sup> embryos from a homozygous stock also exhibited defects in denticle formation, suggesting that Jbug-PF/M/N and/or Jbug-PI are important for actin bundle arrangement within denticles. Whereas the trapezoidal belts of actin-rich pre-denticles were relatively normal overall, there were both fewer and smaller denticle structures in *jbug*<sup>20</sup> and *jbug*<sup>30</sup> mutants compared to wild type (Figure 8, A-C). We counted the number of denticles in each cell from a grid of 24 cells (Figure 8H) for at least five individuals of each genotype. *jbug*<sup>20</sup> embryos had fewer denticles per cell than wild type embryos in several rows of cells (C1, C3, C4 and C6; Figure 8, I and J). Irrespective of which row of cells (C1-C6) was examined, *jbug*<sup>30</sup> embryos had, on average, fewer denticles per cell than wild type embryos (Figure 8, I and J). Expression of *jbug-RF* using the *da-Gal4* driver in *jbug*<sup>30</sup> mutants slightly increased the number of denticles in one row (C1), but not in other rows (C2-C6). Knocking down *jbug-RL* and *jbug-RF/M/N* by RNAi (*GD13033*; Figure 1A) using *da-Gal4* also showed a decrease in the numbers of denticles per cell in rows C4 and C6 compared to wild type (Figure 8, F, I and J).

To test for a role of maternally provided Jbug in embryogenesis, we knocked down *jbug* by expressing each of the three RNAi lines that target different regions of *jbug* splice forms (Figure 1A) using a maternal driver *matα-Gal4*. Knocking down *jbug* using two strong RNAi lines (*GD8664* and *GD13033*; Figure 1A) resulted in very few embryos, suggesting an essential role for Jbug in oogenesis. Knocking down *jbug* using a weak RNAi line *JF01166* (Figures 1A) resulted in embryos with mild morphological defects such as slightly wavy epidermis and deeper grooves for some segmental grooves (Figure 8, G and L), suggesting that maternally provided Jbug proteins are required for normal development. These embryos also showed defects in denticle formation. As observed in *jbug*<sup>20</sup> and *jbug*<sup>30</sup> mutants or *da-Gal4>jbug RNAi* embryos,

462 some cells failed to form denticles (Figure 8, G and I); others formed short denticles with weak  
 463 phalloidin signals (Figure 8G). Quantification showed a decrease in the average number of  
 464 denticles per cell in most columns (except for C2) of each denticle belt with *mat $\alpha$ >jbug RNAi*  
 465 (Figure 8J). Taken together, our data suggest that both maternally and zygotically provided  
 466 Jbug proteins are required for denticle formation.

467

# Discussion

Filamins play important roles in actin reorganization in many developmental processes and disease contexts. In this study we show that different isoforms of Jbug, the *Drosophila* filamin-type protein, are differentially expressed during development. Using new genetic tools that we generated, we reveal essential roles for different Jbug isoforms in viability, epithelial morphogenesis and formation of actin-rich structures.

## Jbug plays a role in formation of actin-rich protrusions

Our results identify isoform-specific roles for Jbug in formation of two prominent actin-rich protrusions in *Drosophila*, bristles on the thorax and denticles in the ventral epidermis of the embryo (Figures 3 and 8). These defects are observed in the presence of Jbug-PL, which contains actin-binding domains and short IG-FLMN repeats, suggesting that this isoform is not sufficient to form actin-rich protrusions in *Drosophila*. Indeed, bristle defects are rescued by expression of Jbug-PF, one of the longest isoforms that contain long IG-FLMN repeats following the actin-binding domains (Fig. 3). These data suggest an important role for protein interactions through the long IG-FLMN repeats in forming actin-rich protrusions. Our interpretation is consistent with a role of filamins in acting as a molecular scaffold. More than 90 filamin-binding partners have been identified, including intracellular signaling molecules, receptors, ion channels, transcription factors, and cytoskeletal and adhesion proteins (Razinia et al., 2012).

Unlike defects in thoracic bristles, defects in denticle formation, although improved, were not fully rescued by overexpression of *jbug-RF* in *jbug<sup>30</sup>* mutant embryos (Figure 8). These data suggest that either Jbug-PI, an isoform that contains long IG-FLMN repeats without actin-binding domains, might contribute to this process or that the expression system failed to provide enough of the *jbug-RF* splice form for rescue. Although Jbug is upregulated in the anterior side of each segment in the embryo, where denticle belts form, Jbug is not enriched in the denticles themselves (Figure 7). Interestingly, another *Drosophila* filamin – Cher – is enriched in denticles, colocalizing with actin protrusions (Dilks and DiNardo 2010). The different subcellular localization of Jbug and Cher in denticle forming cells suggests distinct roles for the two *Drosophila* filamins. Cher likely acts as a component of denticles that organizes actin filaments. A simple model for Jbug function is that the N-terminal actin-binding domains might act to stabilize actin filaments and that protein-protein interactions through long IG-FLMN repeats might recruit other key components for denticle formation to the apical plasma membrane where actin-rich protrusions arise. Indeed, a recent study has shown a role of the shorter Cher isoform



(FLN90) that lacks actin-binding domains as a postsynaptic scaffold in *Drosophila* larval neuromuscular junctions (Lee and Schwarz 2016); FLN90 is required for synaptic localization of several key proteins, including type-A glutamate receptors and Ral GTPase (Lee and Schwarz 2016). Further studies will be needed to identify Jbug-interacting proteins and to reveal their roles in helping Jbug organize higher-order actin structures.

# **Jbug functions in epithelial morphogenesis**

Maternal knockdown of *jbug* using strong RNAi lines results in very few embryos, suggesting Jbug functions in oogenesis. When a weaker RNAi line was used to knock down maternal *jbug*, embryos with mostly normal morphology are generated. When *jbug* was knocked down both maternally and zygotically using the same RNAi line, enhanced morphological defects were observed (Figure 5), suggesting that both maternal and zygotic pools of *jbug* have roles in epithelial morphogenesis. Dynamic localization of Jbug to the apical surface during embryogenesis (Figures 4 and 5) further suggests roles for Jbug in remodeling the actin cytoskeleton and contributing to the mechanical stability of the plasma membrane and the cell cortex. Interestingly, in *jbug*<sup>30</sup> hypomorphic allele, where only Jbug-PC (the smallest isoform that only contain short IG-FLMN repeats) and Jbug-PL (an intermediate isoform that contains actin-binding domains and short IG-FLMN repeats) are intact, no overt defects are observed during embryogenesis except for defects in denticle formation at later stages. As Jbug-PC is not expressed in the embryo (Figure 1), these data indicate that Jbug-PL is sufficient for epithelial morphogenesis during embryogenesis.

Several studies suggest roles for filamin A in tubular epithelial morphogenesis and diseases in tubular organs. During branching of breast cells, the levels of filamin A expression and the extent of the integrin-filamin interaction modulate collagen remodeling to optimize matrix stiffness to support tubulogenesis (Gehler *et al.* 2009). Filamin A is also an important regulator for Polycystin-2, a key molecule in autosomal polycystic kidney disease (Wang *et al.* 2015). Our data also suggests a potential role for Jbug in apical domain reorganization in tubular epithelial cells (Figure 6). Jbug shows strong apical enrichment in the embryonic trachea and the salivary gland (Figure 5) and Jbug overexpression causes an expanded and irregular apical membrane with dispersed Crb localization along the apical surface of salivary gland cells (Figure 6). These data support the idea that appropriate levels of Jbug are important for apical organization during tubular organ development. Loss of apical Jbug enrichment, however, does not cause overt defects in tubular organ formation in *jbug* null or hypomorphic alleles, at least during

embryogenesis (Figure 5). In these alleles, abundant cytoplasmic Jbug signals still remain. Overexpressed Jbug also mainly localizes to the cytoplasm in salivary gland cells (Figure 6). These data suggest that apical enrichment may not be necessary for Jbug function in the formation of tubular epithelia. Knockdown of *jbug* both maternally and zygotically (in the salivary gland a few other tissues) results in severe morphological defects with an abnormal salivary gland formation (Figure 5), indicating that tube formation will be quite abnormal in the complete absence of *jbug* function.

### Potential roles for the smallest isoform Jbug-PC in the nucleus

Jbug-PC only contains four IG-FLMN repeats and lacks actin-binding domains, suggesting that the major mode of action of this smallest Jbug isoform is not cytoskeletal organization. Compared to other Jbug isoforms that are continuously expressed throughout development, Jbug-PC is abundant only during pupation (Figure 1), suggesting transient and specific roles for Jbug-PC. Our study also shows that Jbug-PC localizes both to the nucleus and to the cytoplasm when overexpressed in the embryonic salivary gland (Figure 6). Similar nuclear localization has been observed in human Filamin A. Although full-length filamin A is predominantly cytoplasmic, a C-terminal fragment of Filamin A colocalizes with androgen receptor to the nucleus to act as a co-transcription factor (Loy *et al.* 2003). Therefore, a possible scenario is that Jbug-PC has a role in transcriptional regulation. It will be interesting to test which developmental processes require the function of Jbug-PC during pupation and to reveal its exact roles in those processes.

### Trans-splicing occurs in the *jbug* locus

Trans-splicing, a gene regulatory mechanism that joins exons from two separate transcripts to produce chimeric mRNA, has been detected in most eukaryotes (Horiuchi and Aigaki 2006; Lasda and Blumenthal 2011). In *Drosophila*, trans-splicing has been demonstrated to be an essential process for two genes, *longitudinals lacking* (*lola*) and *modifier of mdg4* (*mod(mdg4)*). In the *lola* locus, the 5'-end of *lola* transcripts contain five exons that splice into 20 variants of 3' exons to generate 20 protein isoforms (Ohsako *et al.* 2003). In the *mod(mdg4)* locus, two mutant alleles of the gene, each located in one of the two homologous chromosomes, restore the wild type function of the gene (Mongelard *et al.* 2002). This phenomenon is very similar to the rescue that we have observed in *jbug*<sup>30</sup>/*Exel6079* and *jbug*<sup>133</sup>/*Exel6079* transheterozygotes (Table 1). The presence of Jbug-PF/M/N isoforms in transheterozygous animals for *jbug* hypomorphs and *Exel6079* (Figure 2) further supports the idea that trans-splicing occurs, where the 5' exons of *jbug*-RF/M/N transcripts on *jbug*<sup>30</sup> or *jbug*<sup>133</sup> are spliced to 3' exons of *jbug*

568 transcripts on the *Exe/6079* chromosome. Recent studies have revealed conserved sequences  
 569 in the *mod(mdg4)* intron that promote trans-splicing in this gene (Gao *et al.* 2015; Tikhonov *et al.*  
 570 2018). Identification of the sequences that promote trans-splicing in the *jbug* locus will help  
 571 better understand this surprising gene regulatory mechanism.

572

573

**Table 1. Complementation test**

|                                                                                                                                                                              | Number of Progeny |         |
|------------------------------------------------------------------------------------------------------------------------------------------------------------------------------|-------------------|---------|
|                                                                                                                                                                              | CyO               | Non-CyO |
| <i>jbug</i> <sup>20</sup> /CyO x <i>jbug</i> <sup>20</sup> /CyO                                                                                                              | >200              | 0       |
| <i>jbug</i> <sup>20</sup> /CyO x <i>Df</i> (2R)59AB/CyO                                                                                                                      | >200              | 0       |
| <i>jbug</i> <sup>20</sup> /CyO x <i>Df</i> (2R)Exel6079/CyO                                                                                                                  | >200              | 0       |
| <i>jbug</i> <sup>30</sup> /CyO x <i>jbug</i> <sup>20</sup> /CyO                                                                                                              | 176               | 12*     |
| <i>jbug</i> <sup>30</sup> (F) x <i>jbug</i> <sup>20</sup> /CFL (M)                                                                                                           | 144               | 50*     |
| <i>jbug</i> <sup>30</sup> /CyO x <i>Df</i> (2R)59AB/CyO                                                                                                                      | 231               | 41*     |
| <i>jbug</i> <sup>30</sup> /CyO x <i>Df</i> (2R)Exel6079/CyO                                                                                                                  | 98                | 91      |
| <i>jbug</i> <sup>133</sup> /CyO x <i>jbug</i> <sup>20</sup> /CyO                                                                                                             | 141               | 62*     |
| <i>jbug</i> <sup>133</sup> (F) x <i>jbug</i> <sup>20</sup> /CFL (M)                                                                                                          | 64                | 70*     |
| <i>Jbug</i> <sup>133</sup> /CyO x <i>Df</i> (2R)59AB/CyO                                                                                                                     | 153               | 47*     |
| <i>jbug</i> <sup>133</sup> /CyO x <i>Df</i> (2R)Exel6079/CyO                                                                                                                 | 140               | 100     |
| * Transheterozygous flies show the same bristle defects as <i>jbug</i> <sup>30</sup> or <i>jbug</i> <sup>133</sup> homozygotes (See Figure 3 for phenotypes in homozygotes). |                   |         |

# Figure legends

**Figure 1. Different isoforms of *jbug* are expressed differentially throughout *Drosophila* development.** (A) Ten annotated splice forms of *jbug* are reported by FlyBase. Cyan bars indicate three RNAi lines for *jbug* that were tested in this study. Two deficiency lines in the *jbug* locus are also indicated. *Df(2R)59AB* deletes the region that spans the entire *jbug* locus. *Df(2R)Exel6079* deletes only the N-terminal region of several *jbug* isoforms that have longer N-termini, including *jbug-RF*, *RM*, *RN* and *RL*. (B) Six different Jbug protein isoforms are made from the different annotated splice forms. Calponin homology domains (yellow pentagon) and filamin-type immunoglobulin domains (green hexagon) are shown. Magenta bars in A and B indicate the region used to generate Jbug antiserum. (C) Developmental RNA-Seq data by Flybase ([www.flybase.org](http://www.flybase.org); FB2020\_04). Note that *jbug-RF*, *RM*, *RN* and *RL* are not expressed until 18 hours of embryogenesis (red arrow). (D) Western blot using protein extracts from embryos (0-2 and 2-16 hours AEL at 25°C), 1st, 2nd and 3rd instar larvae, pupae (2 days APF) and male (M) and female (F) adults (2 days post-eclosion). A number of bands are detected. Bands that correspond to the predicted molecular weights of several isoforms are marked with dots and arrowheads with different colors. Arrowheads of the same colors are used to indicate the major isoforms in B. Molecular mass (kDa) for protein size markers are shown on the left.

**Figure 1.**

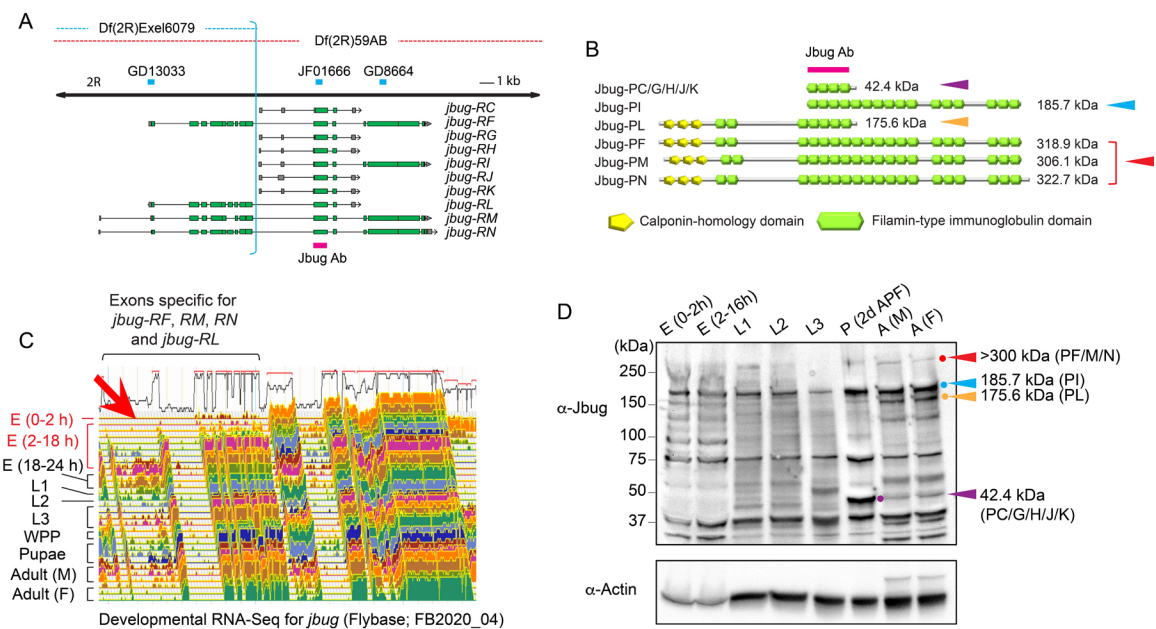

**Figure 2. Generation of null and hypomorphic alleles of *jbug*.** (A-D) Molecular alterations in the null (*jbug*<sup>20</sup>, A) and in two hypomorphic alleles (*jbug*<sup>30</sup> and *jbug*<sup>133</sup>, B-D). Blue and red boxes represent homology arms that were used for homologous recombination. Magenta bar represents a common exon for all isoforms that was used to generate an antibody against Jbug. Two deficiency lines in the *jbug* locus are also indicated. *Df(2R)59AB* deletes the region that spans the entire *jbug* locus. *Df(2R)Exel6079* deletes only the N-terminal region of several *jbug* isoforms that have longer N-termini, including *jbug*-RF, RM, RN and RL. (A) *jbug*<sup>20</sup> deletes exons encoded by all *jbug* splice forms. (B) Hypomorphic alleles were generated by incomplete homologous recombination, with a partial (*jbug*<sup>30</sup>) or a complete (*jbug*<sup>133</sup>) insertion of the donor DNA into the *jbug* isoforms that have a longer C terminus (RF, RM, RN and RI). The insertion occurs in the middle of the coding region or at the 3' UTR of those isoforms in *jbug*<sup>30</sup> and *jbug*<sup>133</sup>, respectively. (C and D) Detailed genomic structures of *jbug*<sup>30</sup> and *jbug*<sup>133</sup> alleles. (C) In *jbug*<sup>30</sup>, one homology arm (red box) in the C-terminus region is recombined properly, but the rest of the construct that contains the left homology arm (blue box) and the *mini-w*<sup>+</sup> fragment is inserted into the *jbug* locus, disrupting several isoforms that have a longer C-terminus, including *jbug*-RF, RM, RN and RI. (D) In *jbug*<sup>133</sup>, the entire construct is inserted into the 3' UTR of *jbug*-RF, RM, RN and RI. (E-H) Western blots using protein extracts from 2-16 hr embryos (E), 1st instar larvae (F), pupae (2 days APF, G) and 2-day old female adults (H) show that different isoforms are affected in each mutant. Bands that correspond to the predicted molecular weights of several isoforms are marked with dots and arrowheads with different colors. Note that whereas *jbug*<sup>20</sup> embryos have most of the protein bands observed in wild type (E), almost all bands are gone in 1st instar larvae (F), suggesting that protein from maternally provided *jbug* mRNA persists during embryogenesis and is gone by the 1st instar larval stage. Asterisks in F, two small bands that are still observed in *jbug*<sup>20</sup> larvae, which could be a nonspecific cross-reactivity. Distinct bands that correspond in size to annotated proteins are marked with dots and arrowheads with different colors. Note that instead of an expected band for Jbug-PI (185.7 kDa, blue arrow and dot), a shorter band (green arrow and dot; ~90 kDa) is observed in *jbug*<sup>30</sup>, suggesting that a truncated protein for Jbug-PI is produced due to the insertion of the DNA construct. Note also that the large Jbug-PF/M/N (>300 kDa) band is also missing in the *jbug*<sup>30</sup> allele. *jbug*<sup>133</sup> appears to show only a reduction in Jbug-PI (185.7 kDa) and the Jbug-PF/M/N (>300 kDa bands). Thus, both *jbug*<sup>30</sup> and *jbug*<sup>133</sup> make wild type levels of Jbug-PL and Jbug-PC/G/H/J/K, but *jbug*<sup>30</sup> does not make PI or PF/M/N, and *jbug*<sup>133</sup> makes reduced levels of PI and PF/M/N. (I, J) Western blots using protein extracts from 2-16 hr embryos (I) and 1st instar larvae (J). (I) In both *59AB* and *Exel6079* homozygous embryos, same protein bands are

detected as wild type. Bands that correspond to the predicted MWs of Jbug-PF/M/N, Jbug-PI and Jbug-PL are marked with dots and arrowheads with different colors. Note that two faint but distinct bands are visible for >300 kDa, suggesting that Jbug-PM (306.1 kDa) and the other two bigger isoforms, Jbug-PF (318.9 kDa) and Jbug-PN (322.7 kDa), are separated in this gel. (J) Whereas two clear bands for Jbug-PF/M/N (>300 kDa; red dots and arrowhead) are shown in wild type, these bands are significantly decreased in *jbug*<sup>30</sup> larvae. Jbug-PI (185.7 kDa; cyan dots and arrowhead) is also clearly missing in *jbug*<sup>30</sup>. In *jbug*<sup>30</sup>/*Exel6079* transheterozygous larvae, Jbug-PF/M/N, Jbug-PI and Jbug-PL bands are all detected, suggesting that transcripts that initiate on the *jbug*<sup>30</sup> chromosome can be transpliced with transcripts made from the *Exel6079* chromosome.



**Figure 2.**

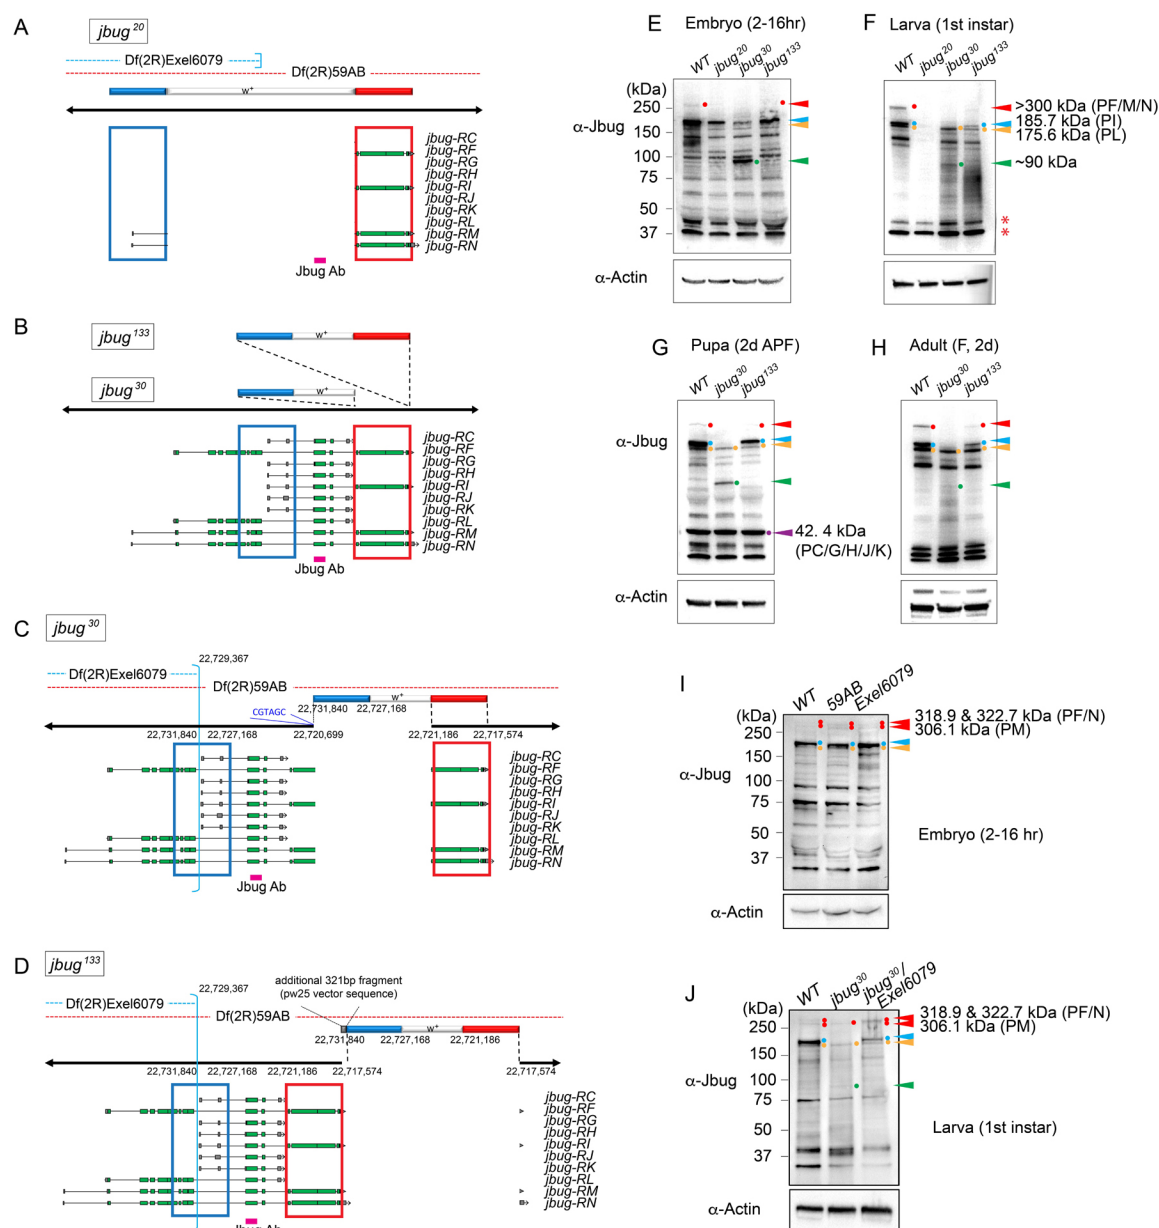

**Figure 3. *jbug*<sup>30</sup> and *jbug*<sup>133</sup> show bristle defects on the adult thorax, which are rescued by expression of Jbug-RF.** (A) Compared to wild type, *jbug*<sup>30</sup> and *jbug*<sup>133</sup> adult flies show distinct thoracic bristle defects, including short bristles with rough ends and bent bristles (arrowheads). *jbug*<sup>133</sup> flies have milder defects than *jbug*<sup>30</sup>. (B) SEM images for bristles in wild type and *jbug*<sup>30</sup> male flies. Bristles in the red and yellow boxes on the flies are shown in higher magnification in a-f. Compared to the nicely elongated and tapered wild-type bristle (a), bristles in *jbug*<sup>30</sup> mutants are short and distorted (c), bent (d), and rough-ended (e). Even when the bristle looks relatively normal, it is often shorter than the wild type and slightly twisted (compare b and f). (a'-f') Higher magnification of a-f is shown. (C, D) Whereas overexpression of Jbug-RC using *69B-Gal4* or *da-Gal4* in an otherwise wild type animal does not cause overt defects in thoracic bristles (C), overexpression of Jbug-RF causes short thick bristles (D; red arrowheads). (E, F) Overexpression of Jbug-RC does not rescue the bristle defects in *jbug*<sup>30</sup> (E; red arrowheads). Jbug-RF expression almost completely rescues the bristle defects in *jbug*<sup>30</sup> (F), leaving only a couple of short bristles (blue arrowheads).

**Figure 3.**

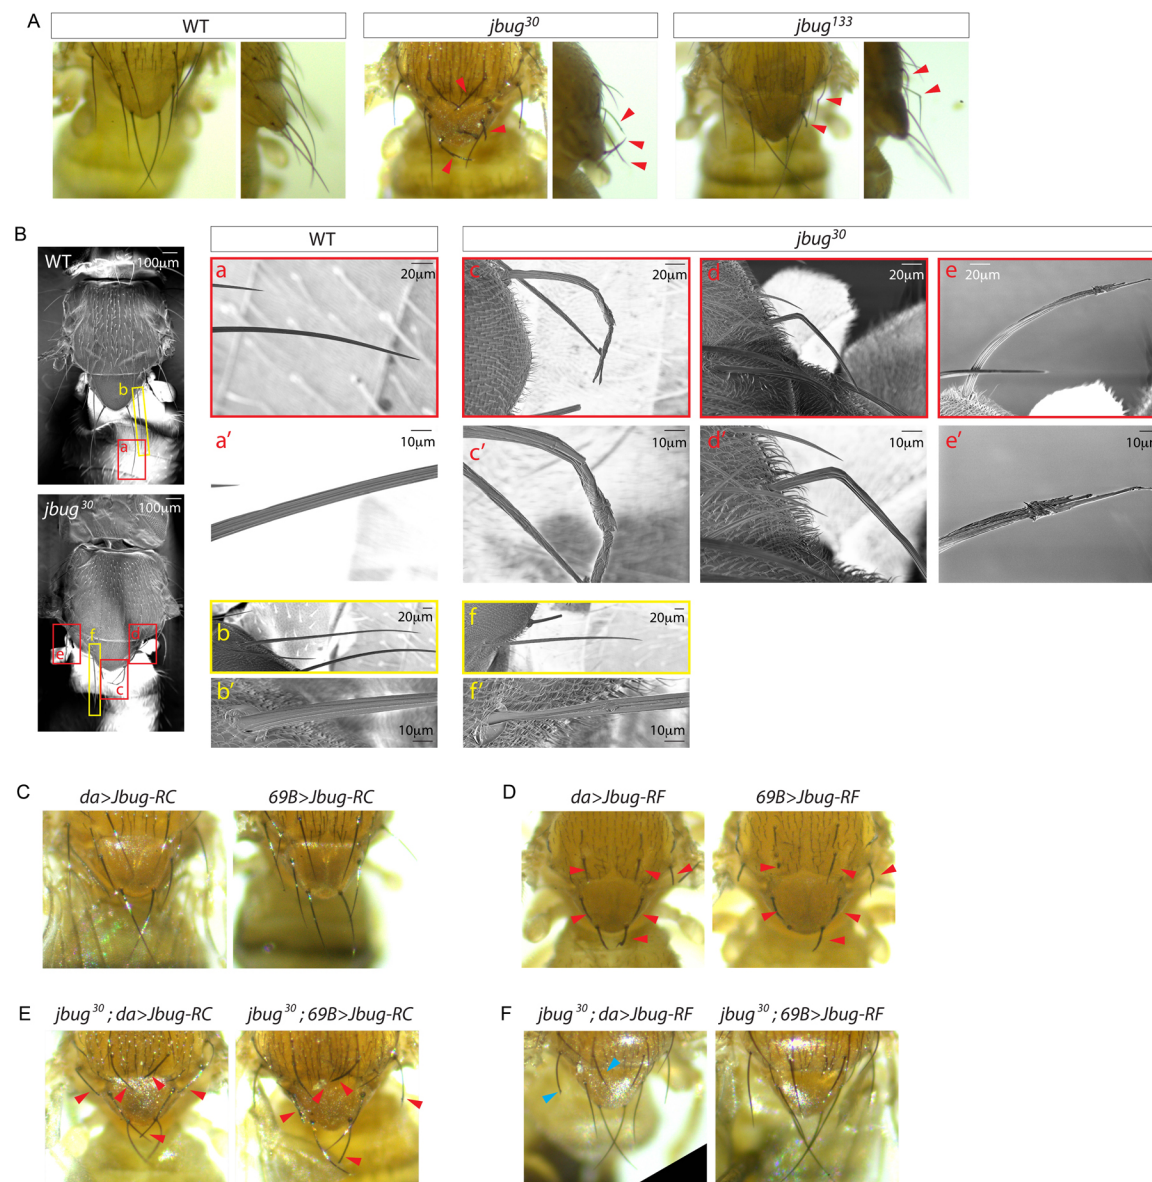

**Figure 4. Analysis of Jbug protein localization in the embryonic epidermis in different *jbug* alleles.** (A) Confocal images for early embryos stained for Jbug (green) and phalloidin (magenta). Jbug localizes as small apical punctate structures. (B-K) Confocal images for epidermis in stage 13 (B, D, F, H, J) and stage 15 (C, E, G, I, K) embryos stained for Jbug (green) and E-Cad (magenta). (B, C) In wild type, whereas high Jbug signals are observed both on the apical surface (arrowheads) and at adherens junctions (arrows) at stage 13 (B), Jbug mostly localizes more uniformly across the apical surface (arrowheads) at stage 15 (C). (D, E) In *jbug*<sup>20</sup> mutants, junctional Jbug signals are absent and signals on the apical surface are weak (arrows in D). (F, G) In *jbug*<sup>30</sup> mutants, overall Jbug signals are very weak and diffused throughout the stages. (H, I) In *jbug*<sup>133</sup> embryos, signals at both the apical surface (arrowheads) and junctions (arrows) are present but are slightly weaker than wild type. (J, K) Jbug-RF overexpression in ectodermal cells driven by *69B-Gal4* in the *jbug*<sup>30</sup> mutant background (J) results in upregulation of Jbug signals in the entire apical domain with junctional enrichment at stage 13 (arrows). Overexpression of Jbug-RF in all cells by *da-Gal4* in the *jbug*<sup>30</sup> mutant background (K) causes upregulation of Jbug signals in the apical domain at stage 15 (arrowheads).



**Figure 4.**

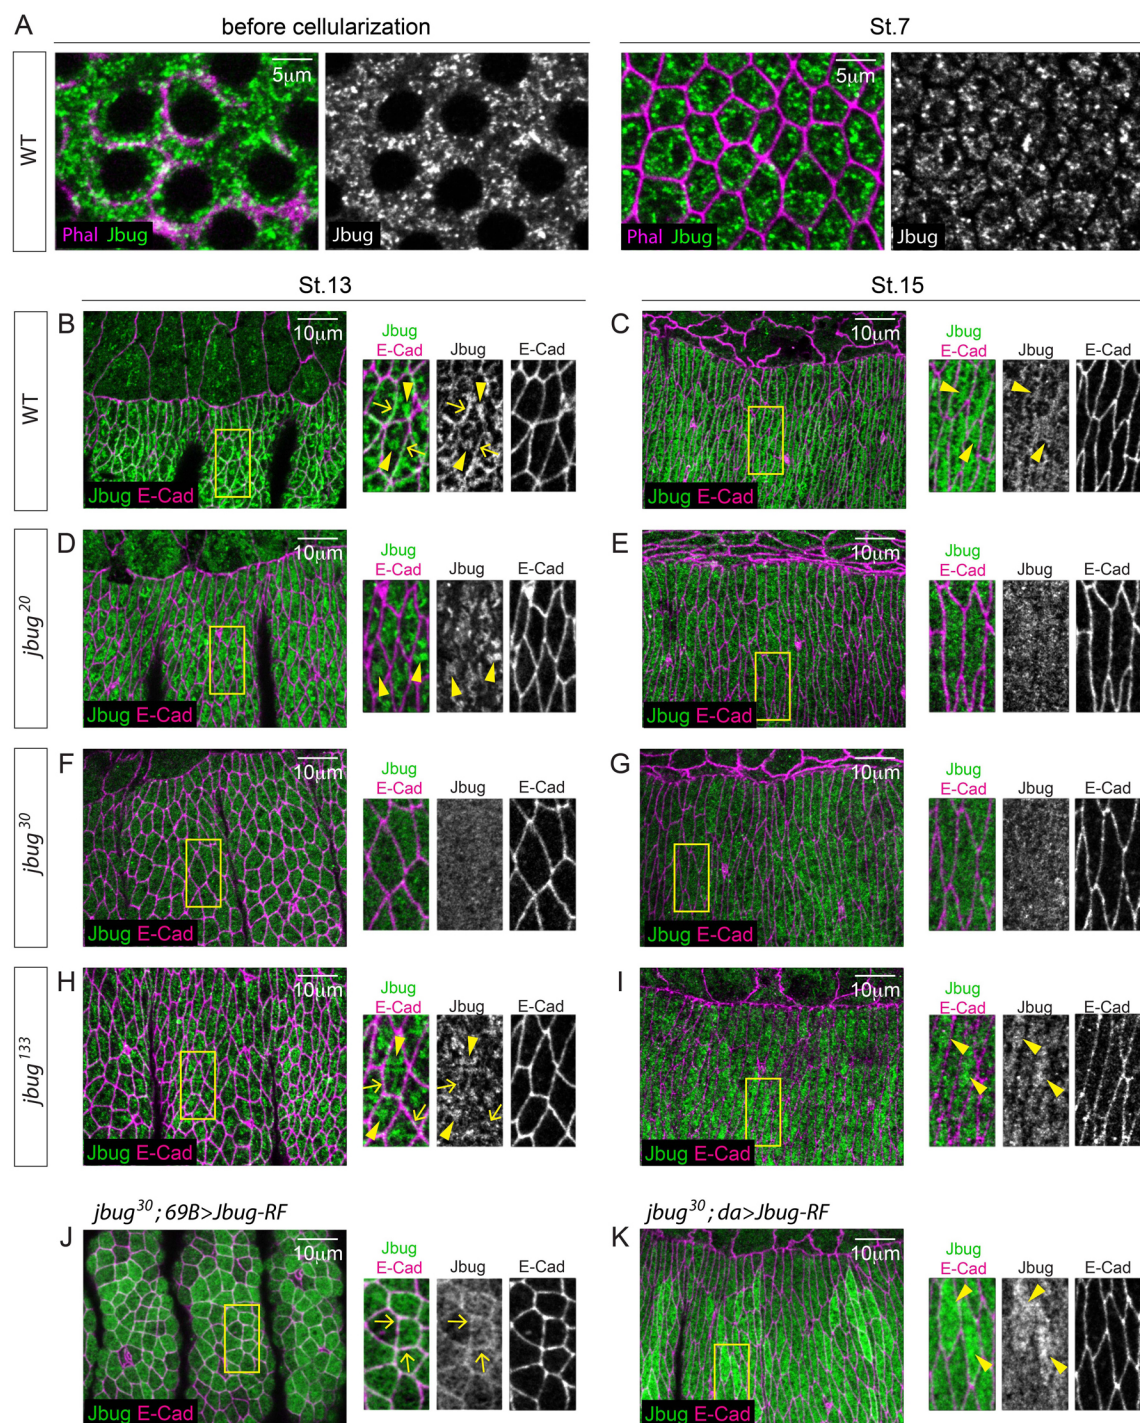

**Figure 5. Jbug protein is apically enriched in the embryonic trachea and the salivary gland and this enrichment is absent in *jbug*<sup>20</sup> and *jbug*<sup>30</sup> mutants.** (A-D) Confocal images of stage 14 embryonic trachea stained for Jbug (green) and E-Cad (magenta). (A) In wild type, weak Jbug signals are observed in all tracheal cells, with enrichment in the apical domain (arrowheads). (B) In *jbug*<sup>20</sup> embryos, Jbug signals in the trachea are mostly absent (arrows). (C) In *jbug*<sup>30</sup> mutant embryos, Jbug signals are diffused in the cytoplasm in tracheal cells (asterisks), with no apical enrichment (arrows; compare to E-Cad signals (arrowheads) in the apical domain). (D) In *jbug*<sup>133</sup>, apical enrichment of Jbug is still present (arrowheads). (E-H) Stage 14 salivary glands stained for Jbug (green) and E-Cad (magenta). (E) Similar to tracheal signals, Jbug is enriched in the apical domain of wild type salivary gland cells (arrowheads) with weak signals in the cytoplasm. (F) In *jbug*<sup>20</sup>, overall Jbug signals are significantly decreased in the salivary gland and apical enrichment is mostly gone (arrow; compare to E-Cad signals (arrowhead) in the apical domain). (G) In *jbug*<sup>30</sup>, Jbug is not apically enriched in the salivary gland (arrow; compare to E-Cad signals (arrowhead) in the apical domain) but diffused in the cytoplasm. (H) In *jbug*<sup>133</sup>, apical enrichment of Jbug is still present (arrowheads). (I, J) Reconstructed confocal images of stage 11 embryos stained for Crb (green, an apical marker) and CrebA (magenta, a salivary gland nuclear marker). Ventrolateral view. Anterior is to the left. Compared to wild type (I), maternal and zygotic knockdown of *jbug* (J) results in a disrupted embryonic morphology. Salivary glands (yellow boxes) are shown in a higher magnification. 3D reconstruction (top) and a single confocal section of the apical surface (bottom) are shown. Compared to a thin salivary gland lumen (arrow in I) and a small invagination pit (asterisks in I), maternal and zygotic knockdown of *jbug* results in a wider lumen (arrow in J) and an elongated invagination pit (asterisks in J).



**Figure 5.**

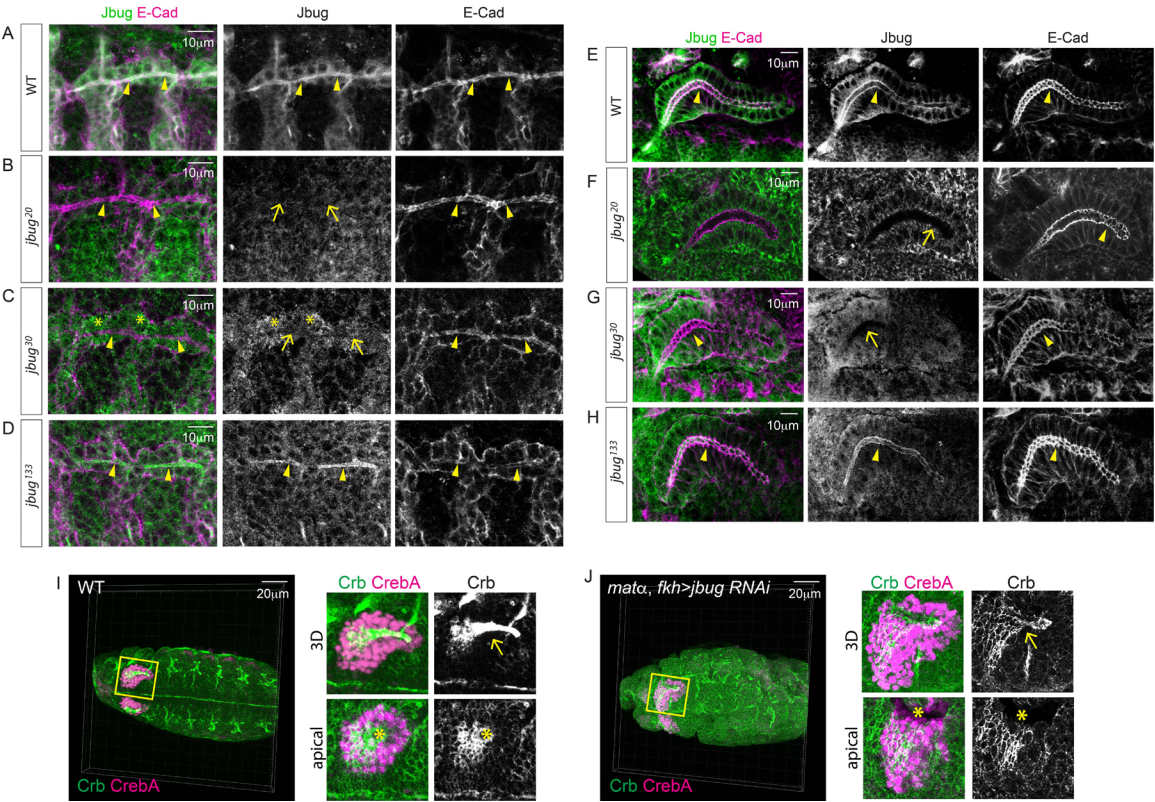

**Figure 6. Jbug overexpression causes mislocalization of Crb along the apical surface and an expanded and irregular apical domain in the embryonic salivary gland.** (A-D) stage 16 salivary glands stained for Crb (green), Jbug (magenta), GFP (magenta in C) and salivary gland nuclear markers CrebA (A, B, C, E and F) and Sage (D). Salivary glands overexpressing Tmem-GFP (control, A), Jbug-RC (B), Jbug-RC-GFP (C), Jbug-RL (D) and Jbug-RF (E, F) are shown. Note that Jbug mainly localizes to the cytoplasm and only shows weak apical signals in stage 16 salivary glands (red arrow in A; compare to Figure 5E). Jbug-RC (B) and Jbug-RC-GFP (C) localize both to salivary gland nuclei and to the cytoplasm when overexpressed. Jbug overexpression causes an expanded and irregular salivary gland lumen (B-F). Irregular salivary gland lumen is worsened when stronger UAS lines are used (compare B and C; also compare E and F). Compared to subapical Crb signals along AJs in control salivary gland cells (inset in A; yellow arrows), Crb signals are dispersed along the entire apical domain in Jbug-overexpressing salivary glands (insets in B-F).



**Figure 6.**

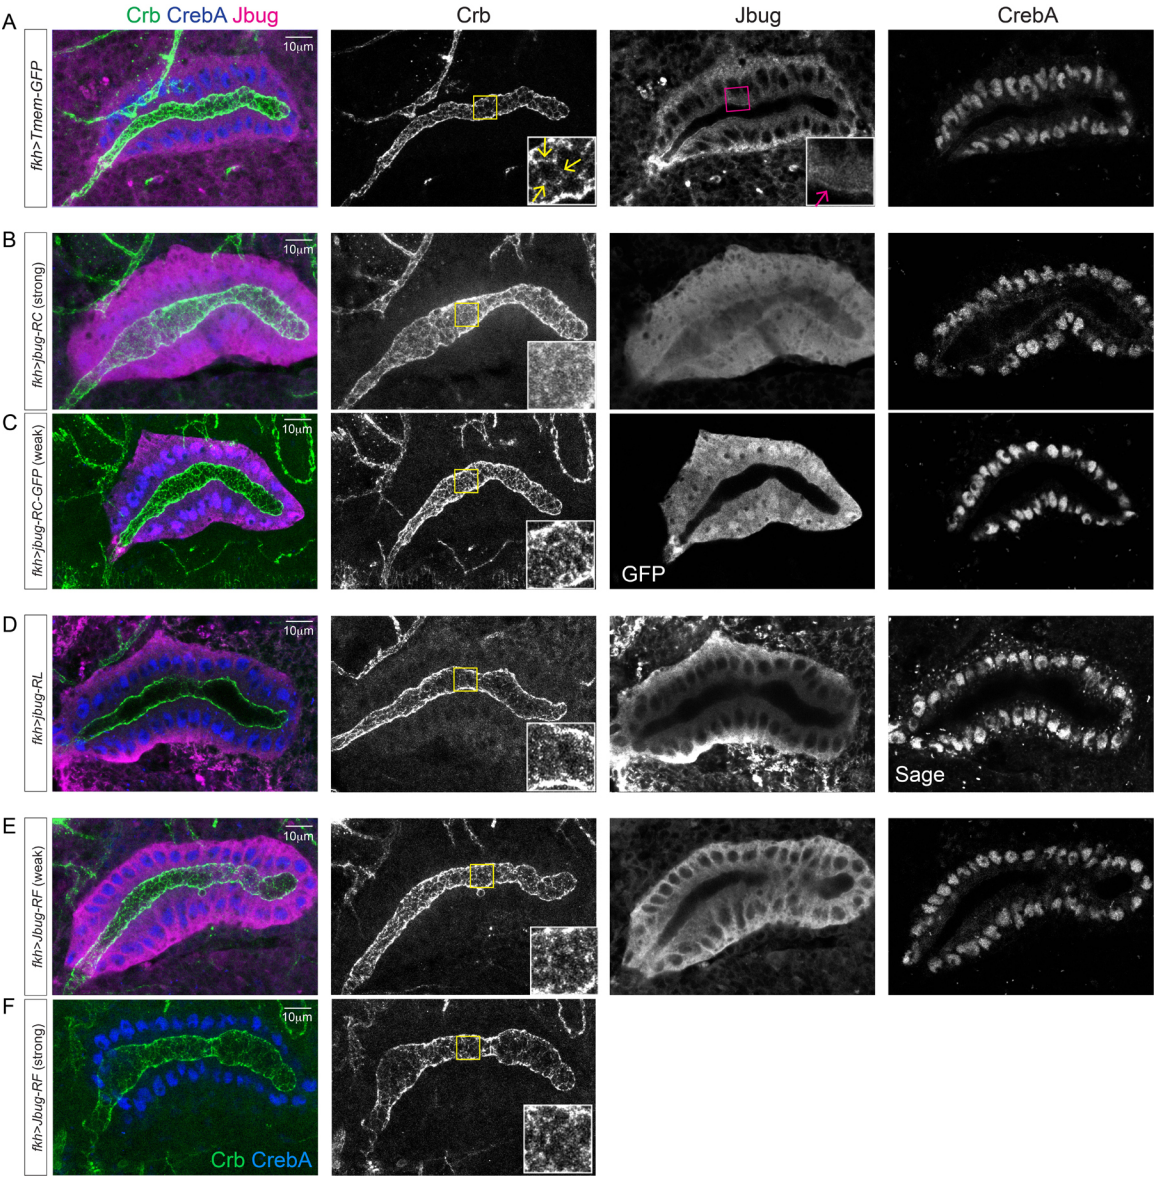

**Figure 7. Jbug protein is upregulated in the anterior part of each segment just prior to the formation of actin-rich denticles in the same region.** (A-D) Epidermis in stages 13 (A), 14 (B), 15 (C) and 16 (D) embryos stained for phalloidin (red), Jbug (green) and E-Cad (magenta). (A) At stage 13, Jbug is mostly uniform across epidermis. (B) At stage 14, actin begins to be upregulated in the anterior side of each segment. Jbug also shows accumulation in the apical domain of epidermal cells in the anterior side of the segment. (C-D) At stages 15 (C) and 16 (D), actin-rich denticles form in the anterior side of each segment. Jbug still shows higher levels in those regions. A and P represent the anterior and the posterior side, respectively. Yellow dotted lines, ventral midline.

**Figure 7.**

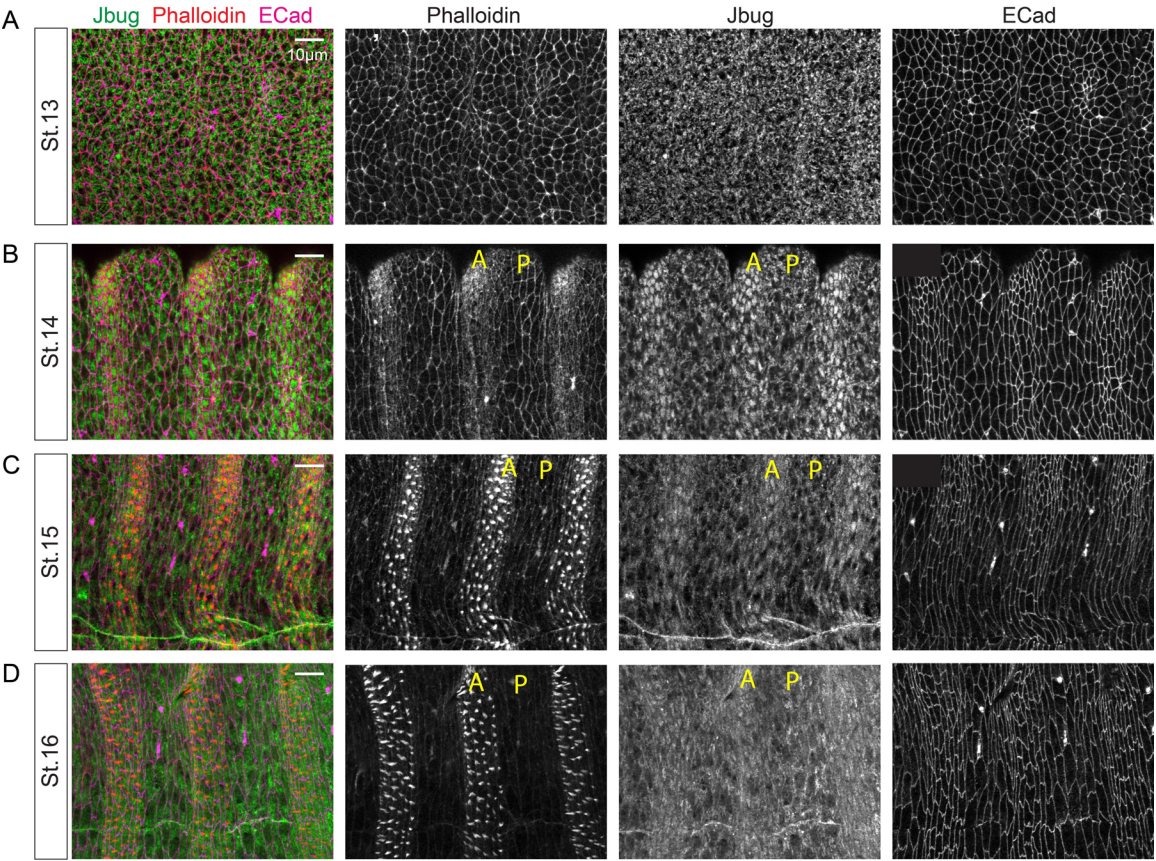

**Figure 8. Jbug regulates the formation of denticle precursors in the ventral epidermis of the embryo.** (A-G) Stage 16 embryos stained for E-Cad (magenta; cell boundaries) and phalloidin (green; denticles). Ventral epidermis in wild type (A), *jbug*<sup>20</sup> (B) *jbug*<sup>30</sup> (C), *jbug*<sup>30</sup>; *da-Gal4>Jbug-RF* (D), *da-Gal4>UAS-Jbug-RF* (E), *da-Gal4>jbug RNAi* (GD13033) (F) and *mata-Gal4>jbug RNAi* (JF01166) (G) is shown. (A) Epidermal cells at the denticle belt in the abdominal segment 5 (yellow box) are shown at higher magnification. Dotted yellow lines, ventral midline. (B-G) Epidermal cells of the same region as in A are shown. For all the embryos, anterior is to the left. (B, G) *jbug*<sup>20</sup> mutants and embryos maternally knocked down *jbug* show mild defects in the embryo morphology, such as wavy epidermis (red arrowheads in B and G; cells are out of focus). Occasionally, cells either fail to form denticles (white arrowhead in G) or form very short denticles (orange arrowheads in B and G). (H) A cartoon for quantification of the denticle numbers. Four cells that are closest to the ventral midline were chosen in each of the six columns of cells in denticle belts in abdominal segments 4, 5 and 6 (column 1, most anterior). (I) Percentage of cells that have different numbers of denticles. (J) Quantification of the average number of denticles per cell in each column of the belt. Student's t-test with Welch's correction is used for statistics calculation. (K, L) Reconstructed 3D images for stage 16 wild type (K) and *mata-Gal4>jbug RNAi* (L) embryos stained for Crb (green; apical membrane) and CrebA (magenta; salivary gland nuclear marker). Maternal knockdown of *jbug* does not cause overt morphological defects in the embryo, except for uneven epidermis (yellow arrows in L).



**Figure 8.**

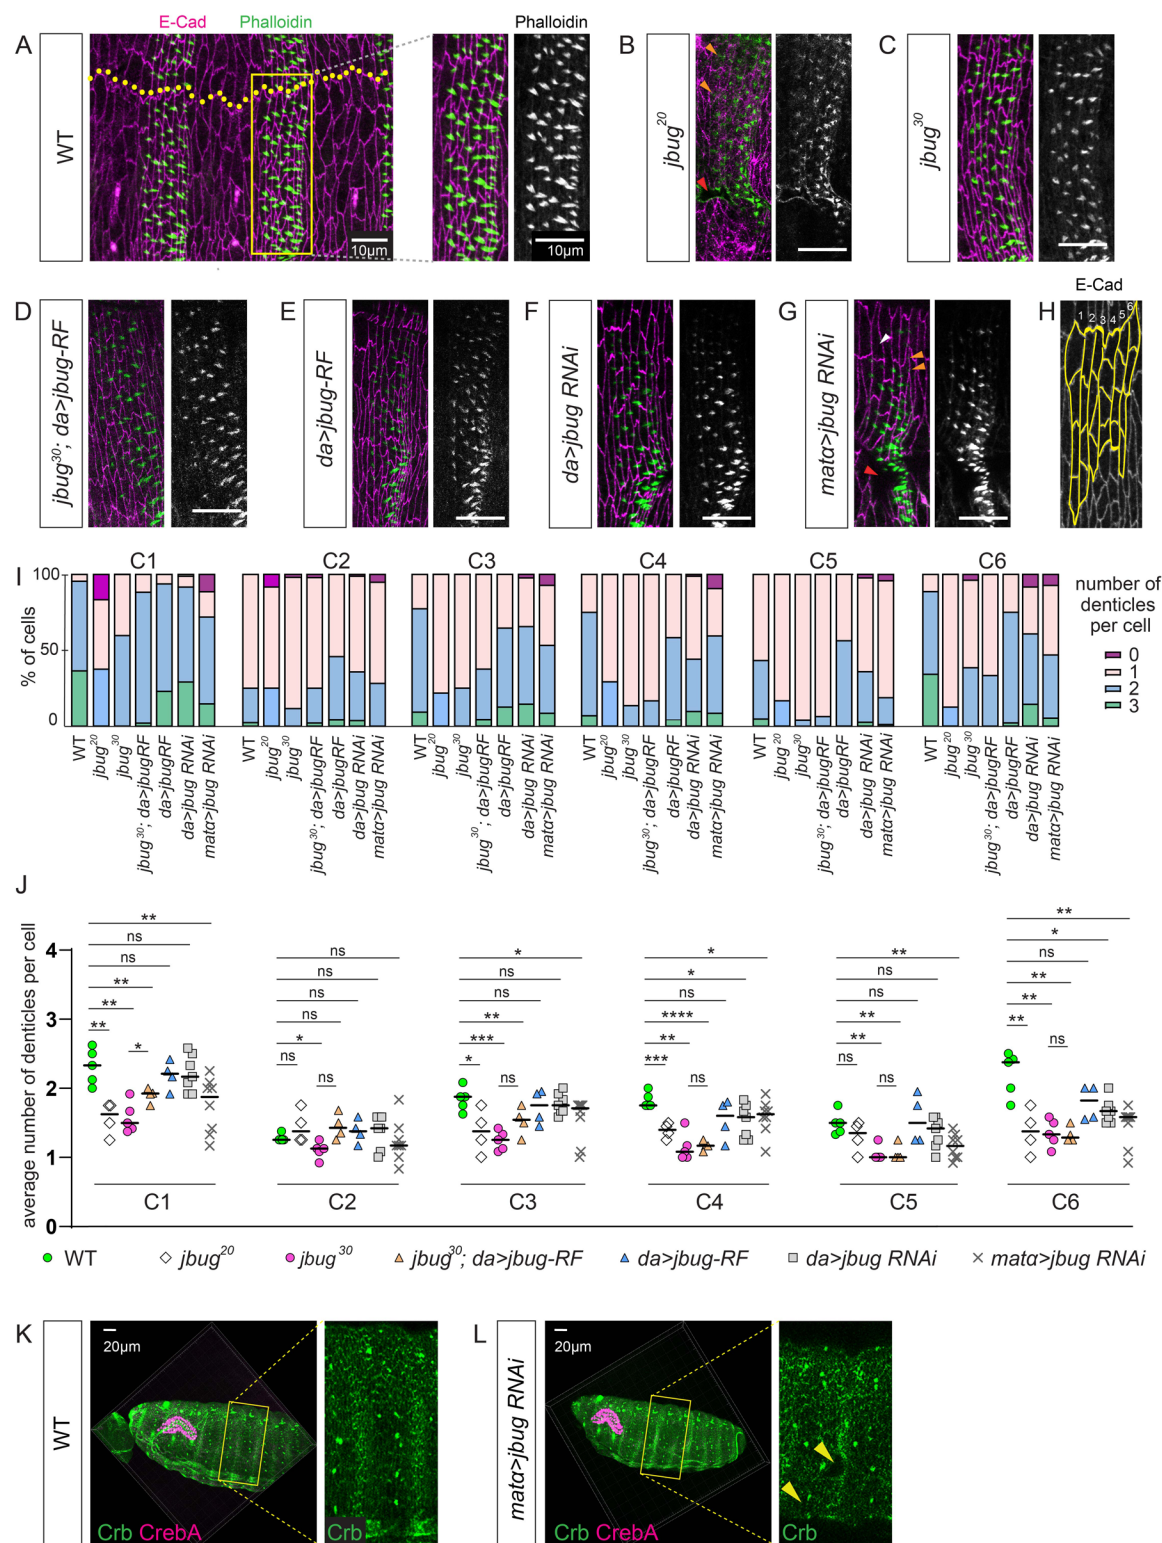

**Supplemental Figure 1. Reverse transcriptase-PCR (RT-PCR) reveals a loss of *jbug* mRNA in *jbug*<sup>20</sup> null mutants.** (A) Genomic structures for the *jbug* locus. Blue and red arrows represent primers used for RT-PCR. (B and C) RT-PCR using cDNAs made from wild type (OR) and *jbug*<sup>20</sup> homozygous embryos. Whereas RT-PCR using wild type cDNA produces a PCR product of expected sizes (left lanes in B and C), no bands are detected in *jbug*<sup>20</sup> (right lanes in B and C).

770 **Supplemental Figure 1.**

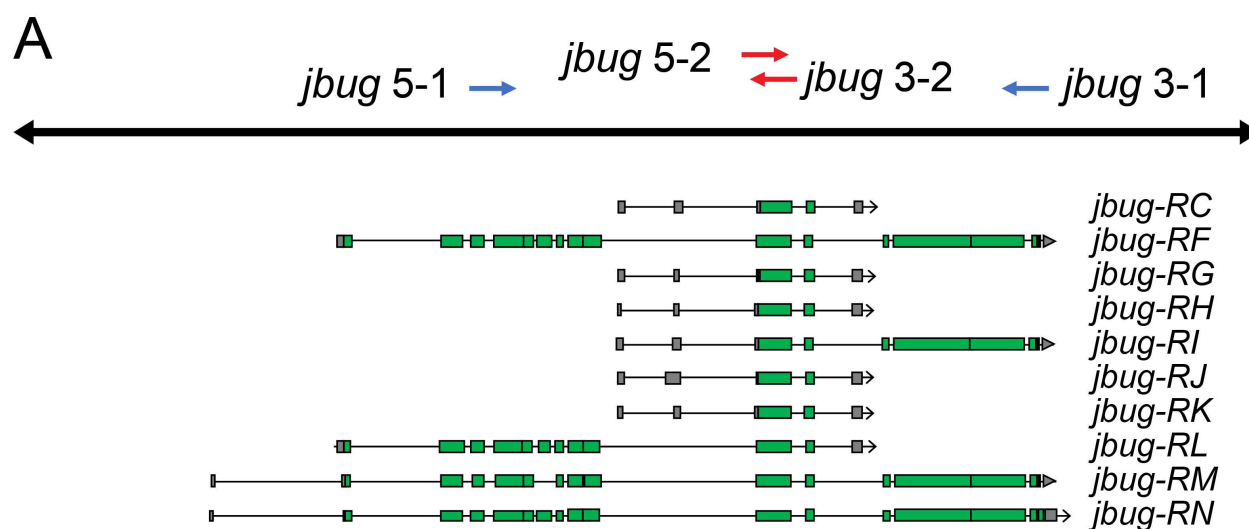

**B** *jbug* 5-1/*jbug* 3-1  
 expected size: 7.1 kb

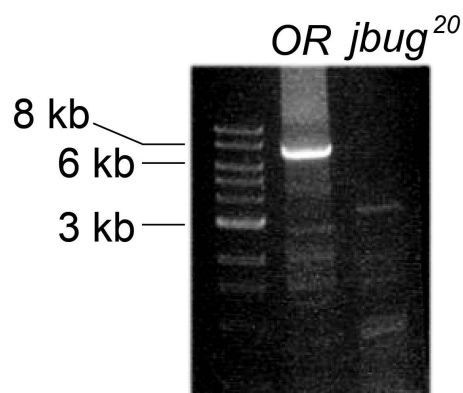

**C** *jbug* 5-2/*jbug* 3-2  
 expected size: 1.2 kb

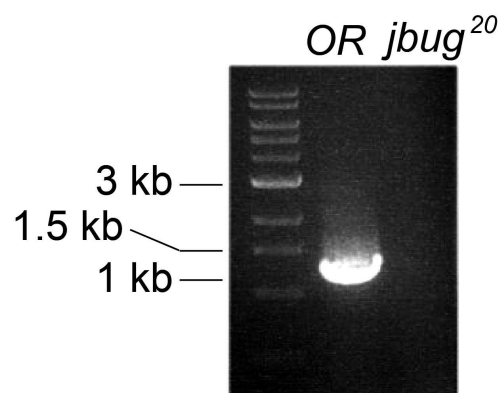



**Supplemental Figure 2. Mutations in *jbug* cause mild planar cell polarity defects in adult wing hair orientation.** (A-C) Compared to relatively distal orientation of wing hairs in the wild type wing (A), wings in *jbug*<sup>30</sup> (B) and *jbug*<sup>133</sup> (C) mutants show mild swirling patterns of wing hairs. White boxed regions are shown in higher magnification in the bottom. (D, E) Wild type (D) and *jbug*<sup>30</sup> mutant (E) pupal wings (32 hours APF) stained for phalloidin. Prehair formation is delayed in the pupal wing in *jbug*<sup>30</sup>. (F, G) Adult ommatidia of wild type (F) and *jbug*<sup>30</sup> (G) near the dorsal/ventral boundary, the equator. Schematic drawings are shown in the panels below the actual images. Green and magenta shapes indicate the orientation of ommatidia that is normally found in the dorsal and ventral hemisphere of the eye, respectively. *jbug*<sup>30</sup> flies do not show planar cell polarity defects in the orientation of ommatidia.

# Supplemental Figure 2.

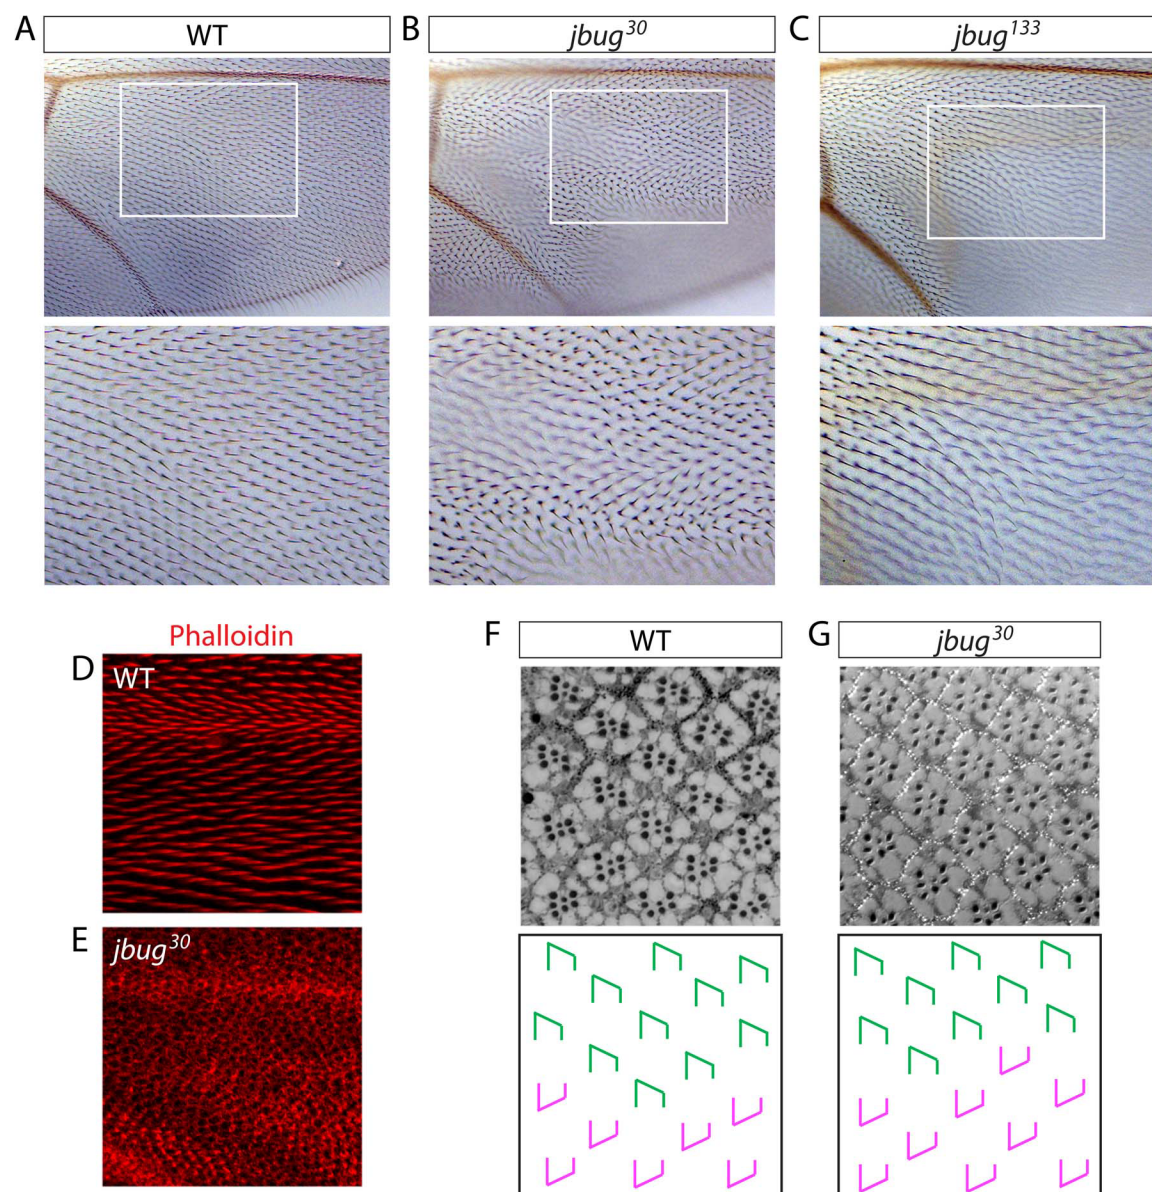

## 787 **Acknowledgments**

788 We thank the members of the Chung and the Andrew laboratories for comments and  
789 suggestions. We thank M. Mlodzik and the Bloomington stock center for fly stocks and the  
790 Developmental Studies Hybridoma Bank for antibodies. We thank Flybase for the gene  
791 information. This work is supported by start-up fund from Louisiana State University to S.C. and  
792 NIH RO1 DE013899 to D.A.

793

# References

- Adler P. N., 2012 The frizzled/stan pathway and planar cell polarity in the Drosophila wing. *Curr. Top. Dev. Biol.* 101: 1–31. <https://doi.org/10.1016/b978-0-12-394592-1.00001-6>
- Bedolla R. G., Y. Wang, A. Asuncion, K. Chamie, S. Siddiqui, *et al.*, 2009 Nuclear versus cytoplasmic localization of filamin a in prostate cancer: Immunohistochemical correlation with metastases. *Clin. Cancer Res.* 15: 788–796. <https://doi.org/10.1158/1078-0432.CCR-08-1402>
- Bejsovec A., 2013 Wingless/Wnt signaling in Drosophila: The pattern and the pathway. *Mol. Reprod. Dev.* 80: 882–894. <https://doi.org/10.1002/mrd.22228>
- Browne K. A., R. W. Johnstone, D. A. Jans, and J. A. Trapani, 2000 Filamin (280-kDa actin-binding protein) is a caspase substrate and is also cleaved directly by the cytotoxic T lymphocyte protease granzyme B during apoptosis. *J. Biol. Chem.* 275: 39262–39266. <https://doi.org/10.1074/jbc.C000622200>
- Chung S. Y., C. Chavez, and D. J. Andrew, 2011 Trachealess (Trh) regulates all tracheal genes during Drosophila embryogenesis. *Dev. Biol.* 360: 160–172. <https://doi.org/10.1016/j.ydbio.2011.09.014>
- Chung S., and D. J. Andrew, 2014 Cadherin 99C regulates apical expansion and cell rearrangement during epithelial tube elongation. *Development* 141: 1950–60. <https://doi.org/10.1242/dev.104166>
- Dilks S. A., and S. DiNardo, 2010 Non-cell-autonomous control of denticle diversity in the Drosophila embryo. *Development* 137: 1395–1404. <https://doi.org/10.1242/dev.045450>
- Flier A. Van der, and A. Sonnenberg, 2001 Structural and functional aspects of filamins. *Biochim. Biophys. Acta - Mol. Cell Res.* 1538: 99–117. [https://doi.org/10.1016/S0167-4889\(01\)00072-6](https://doi.org/10.1016/S0167-4889(01)00072-6)
- Fox R. M., A. Vaishnavi, R. Maruyama, and D. J. Andrew, 2013 Organ-specific gene expression: The bHLH protein Sage provides tissue specificity to Drosophila FoxA. *Dev.* 140: 2160–2171. <https://doi.org/10.1242/dev.092924>
- Gao J. L., Y. J. Fan, X. Y. Wang, Y. Zhang, J. Pu, *et al.*, 2015 A conserved intronic U1 snRNP-binding sequence promotes trans-splicing in Drosophila. *Genes Dev.* 29: 760–771. <https://doi.org/10.1101/gad.258863.115>
- Gay O., B. Gilquin, F. Nakamura, Z. A. Jenkins, R. McCartney, *et al.*, 2011 RefilinB (FAM101B) targets FilaminA to organize perinuclear actin networks and regulates nuclear shape. *Proc. Natl. Acad. Sci. U. S. A.* 108: 11464–11469. <https://doi.org/10.1073/pnas.1104211108>
- Gehler S., M. Baldassarre, Y. Lad, J. L. Leight, M. A. Wozniak, *et al.*, 2009 Filamin A– $\alpha$ 1

Integrin Complex Tunes Epithelial Cell Response to Matrix Tension. *Mol. Biol. Cell* 20: 3224–3238. <https://doi.org/10.1091/mbc.E08>

Gong W. J., and K. G. Golic, 2003 Ends-out, or replacement, gene targeting in *Drosophila*. *Proc. Natl. Acad. Sci. U. S. A.* 100: 2556–2561. <https://doi.org/10.1073/pnas.0535280100>

Gorlin J. B., R. Yamin, S. Egan, M. Stewart, T. P. Stossel, *et al.*, 1990 Human endothelial actin-binding protein (ABP-280, nonmuscle filamin): A molecular leaf spring. *J. Cell Biol.* 111: 1089–1105. <https://doi.org/10.1083/jcb.111.3.1089>

Häcker U., and N. Perrimon, 1998 DRhoGEF2 encodes a member of the Dbl family of oncogenes and controls cell shape changes during gastrulation in *Drosophila*. *Genes Dev.* 12: 274–284. <https://doi.org/10.1101/gad.12.2.274>

Henderson K. D., and D. J. Andrew, 2000 Regulation and function of Scr, exd, and hth in the *Drosophila* salivary gland. *Dev. Biol.* 217: 362–374. <https://doi.org/10.1006/dbio.1999.9560>

Horiuchi T., and T. Aigaki, 2006 Alternative trans-splicing: a novel mode of pre-mRNA processing. *Biol. Cell* 98: 135–140. <https://doi.org/10.1042/bc20050002>

Huelsmann S., N. Rintanen, R. Sethi, N. H. Brown, and J. Yläne, 2016 Evidence for the mechanosensor function of filamin in tissue development. *Sci. Rep.* 6: 2–9. <https://doi.org/10.1038/srep32798>

Krueger D., T. Quinkler, S. A. Mortensen, C. Sachse, and S. de Renzis, 2019 Cross-linker-mediated regulation of actin network organization controls tissue morphogenesis. *J. Cell Biol.* 218: 2743–2761. <https://doi.org/10.1083/JCB.201811127>

Külshammer E., and M. Uhlirova, 2013 The actin cross-linker filamin/cheerio mediates tumor malignancy downstream of JNK signaling. *J. Cell Sci.* 126: 927–938. <https://doi.org/10.1242/jcs.114462>

Lasda E. L., and T. Blumenthal, 2011 Trans-splicing. *Wiley Interdiscip. Rev. RNA* 2: 417–434. <https://doi.org/10.1002/wrna.71>

Lee G. Y., and T. L. Schwarz, 2016 Filamin, a synaptic organizer in *Drosophila*, determines glutamate receptor composition and membrane growth. *Elife* 5: 1–29. <https://doi.org/10.7554/eLife.19991>

Li M., M. Serr, K. Edwards, S. Ludmann, D. Yamamoto, *et al.*, 1999 during *Drosophila* Oogenesis. *Cell* 146: 1061–1073.

Loy C. J., K. S. Sim, and E. L. Yong, 2003 Filamin-A fragment localizes to the nucleus to regulate androgen receptor and coactivator functions. *Proc. Natl. Acad. Sci. U. S. A.* 100: 4562–4567. <https://doi.org/10.1073/pnas.0736237100>

Manieu C., G. H. Olivares, F. Vega-Macaya, M. Valdivia, and P. Olgún, 2018 Jitterbug/Filamin

and Myosin-II form a complex in tendon cells required to maintain epithelial shape and polarity during musculoskeletal system development. *Mech. Dev.* 154: 309–314.  
<https://doi.org/10.1016/j.mod.2018.09.002>

Mongelard F., M. Labrador, E. M. Baxter, T. I. Gerasimova, and V. G. Corces, 2002 Trans-splicing as a novel mechanism to explain interallelic complementation in *Drosophila*. *Genetics* 160: 1481–1487.

Nakamura F., T. P. Stossel, and J. H. Hartwig, 2011 The filamins: Organizers of cell structure and function. *Cell Adh. Migr.* 5: 160–169. <https://doi.org/10.4161/cam.5.2.14401>

Ohsako T., T. Horiuchi, T. Matsuo, S. Komaya, and T. Aigaki, 2003 *Drosophila lola* encodes a family of BTB-transcription regulators with highly variable C-terminal domains containing zinc finger motifs. *Gene* 311: 59–69. [https://doi.org/10.1016/S0378-1119\(03\)00554-7](https://doi.org/10.1016/S0378-1119(03)00554-7)

Ohta Y., and J. H. Hartwig, 1996 Phosphorylation of actin-binding protein 280 by growth factors is mediated by p90 ribosomal protein S6 kinase. *J. Biol. Chem.* 271: 11858–11864.  
<https://doi.org/10.1074/jbc.271.20.11858>

Olguín P., A. Glavic, and M. Mlodzik, 2011 Intertissue mechanical stress affects Frizzled-mediated planar cell polarity in the *Drosophila notum* epidermis. *Curr. Biol.* 21: 236–42.  
<https://doi.org/10.1016/j.cub.2011.01.001>

Oliva C., C. Molina-Fernandez, M. Maureira, N. Candia, E. Lopez, *et al.*, 2015 Hindsight regulates photoreceptor axon targeting through transcriptional control of jitterbug/Filamin and multiple genes involved in axon guidance in *Drosophila*. *Dev. Neurobiol.* 75: 1018–1032. <https://doi.org/10.1002/dneu.22271>

Razinia Z., T. Mäkelä, J. Ylännä, and D. a Calderwood, 2012 Filamins in mechanosensing and signaling. *Annu. Rev. Biophys.* 41: 227–46. <https://doi.org/10.1146/annurev-biophys-050511-102252>

Rorth Pe., 1996 A modular misexpression screen in *Drosophila* detecting tissue-specific phenotypes. *Proc. Natl. Acad. Sci.* 93: 12418–12422.

Sasaki E., A. T. Byrne, E. Phelan, D. W. Cox, and W. Reardon, 2019 A review of filamin A mutations and associated interstitial lung disease. *Eur. J. Pediatr.* 178: 121–129.  
<https://doi.org/10.1007/s00431-018-3301-0>

Savoy R. M., and P. M. Ghosh, 2013 The dual role of filamin A in cancer: Can't live with (too much of) it, can't live without it. *Endocr. Relat. Cancer* 20: 341–356.  
<https://doi.org/10.1530/ERC-13-0364>

Shao Q. Q., T. P. Zhang, W. J. Zhao, Z. W. Liu, L. You, *et al.*, 2016 Filamin A: Insights into its Exact Role in Cancers. *Pathol. Oncol. Res.* 22: 245–252. <https://doi.org/10.1007/s12253->



015-9980-1

- Sokol N. S., and L. Cooley, 1999 *Drosophila* Filamin encoded by the cheerio locus is a component of ovarian ring canals. *Curr. Biol.* 9: 1221–1230. [https://doi.org/10.1016/S0960-9822\(99\)80502-8](https://doi.org/10.1016/S0960-9822(99)80502-8)
- Sokol N. S., and L. Cooley, 2003 *Drosophila* filamin is required for follicle cell motility during oogenesis. *Dev. Biol.* 260: 260–272. [https://doi.org/10.1016/S0012-1606\(03\)00248-3](https://doi.org/10.1016/S0012-1606(03)00248-3)
- Song J., and M. A. Tanouye, 2006 Seizure suppression by shakB2, a gap junction mutation in *Drosophila*. *J. Neurophysiol.* 95: 627–635. <https://doi.org/10.1152/jn.01059.2004>
- Tepass U., 1996 Crumbs, a component of the apical membrane, is required for zonula adherens formation in primary epithelia of *Drosophila*. *Dev. Biol.* 177: 217–225. <https://doi.org/10.1006/dbio.1996.0157>
- Thurmond J., J. L. Goodman, V. B. Strelets, H. Attrill, L. S. Gramates, *et al.*, 2019 FlyBase 2.0: The next generation. *Nucleic Acids Res.* 47: D759–D765. <https://doi.org/10.1093/nar/gky1003>
- Tikhonov M., M. Utkina, O. Maksimenko, and P. Georgiev, 2018 Conserved sequences in the *Drosophila* mod(mdg4) intron promote poly(A)-independent transcription termination and trans-splicing. *Nucleic Acids Res.* 46: 10608–10618. <https://doi.org/10.1093/nar/gky716>
- Tirupula K. C., S. S. Ithychanda, M. L. Mohan, S. V. Naga Prasad, J. Qin, *et al.*, 2015 G protein-coupled receptors directly bind filamin A with high affinity and promote filamin phosphorylation. *Biochemistry* 54: 6673–6683. <https://doi.org/10.1021/acs.biochem.5b00975>
- Wang Y., J. I. Kreisberg, R. G. Bedolla, M. Mikhailova, R. W. Devere White, *et al.*, 2007 A 90 kDa fragment of filamin A promotes Casodex-induced growth inhibition in Casodex-resistant androgen receptor positive C4-2 prostate cancer cells. *Oncogene* 26: 6061–6070. <https://doi.org/10.1038/sj.onc.1210435>
- Wang Q., W. Zheng, Z. Wang, J. W. Yang, S. Hussein, *et al.*, 2015 Filamin-A increases the stability and plasma membrane expression of polycystin-2. *PLoS One* 10: 1–19. <https://doi.org/10.1371/journal.pone.0123018>
- Wodarz A., U. Hinz, M. Engelbert, and E. Knust, 1995 Expression of crumbs confers apical character on plasma membrane domains of ectodermal epithelia of *drosophila*. *Cell* 82: 67–76. [https://doi.org/10.1016/0092-8674\(95\)90053-5](https://doi.org/10.1016/0092-8674(95)90053-5)
- Yue J., S. Huhn, and Z. Shen, 2013 Complex roles of filamin-A mediated cytoskeleton network in cancer progression. *Cell Biosci.* 3: 1. <https://doi.org/10.1186/2045-3701-3-7>
